# Supplementary material for: Design and development of imidazo[4,5-f] [1,10] phenanthroline-Zn(ii) based fluorescent probes for specific recognition of ATP with tunable optical responses and probing the enzymatic hydrolysis of ATP by alkaline phosphatase
Source: Royal Society of Chemistry journal article supplement (doi:10.1039/d2nj04704g), 2022-01-01
Supplement: d2nj04704g1.pdf [file d2nj04704g1.pdf]

## Supplementary Information

### Design and development of Imidazo[4,5-f] [1,10] phenanthroline-Zn (II) based fluorescent probes for specific recognition of ATP with tunable optical responses and probing the enzymatic hydrolysis of ATP by alkaline phosphatase

Priya Rana, Abigail Jennifer G, Mallayasamy Siva, Elumalai Varathan\* and Priyadip Das\*

Department of Chemistry, SRMIST, SRM Nagar, Potheri, Kattankulathur, Kancheepuram District, Chennai, Tamil Nadu, 603203, India.

\* Email: [priyadipcsmc@gmail.com](mailto:priyadipcsmc@gmail.com), [vrathan.elumalai85@gmail.com](mailto:vrathan.elumalai85@gmail.com)

### Experimental section

**Synthesis of 1,10-Phenanthroline-5,6-Dione:** A mixture of 1,10-phenanthroline monohydrate (3gm, 15.5 mmol) and potassium bromide (3g, 25.2 mmol) were added into a two neck round bottom flask. Then ice-cold mixture of conc. HNO<sub>3</sub> (15ml) and conc. H<sub>2</sub>SO<sub>4</sub> (30ml) were mixed dropwise at 0°C for 1h. This reaction mixture was heated at 100°C for 30 minutes with stirring. The hot reaction mixture was cooled to room temperature and neutralized by NaOH solution. A yellow colour precipitate was formed. The precipitate was separated, dried, and purified by column chromatography on silica gel eluting with CH<sub>3</sub>OH/CHCl<sub>3</sub> (2:98, v/v). Yield = 2.1 gm, (9.40 mmol, 60.86 %) (Scheme S1). (<sup>1</sup>H NMR, DMSO-*d*<sub>6</sub>, 500 MHz, δppm): 9.00-8.98 (m, 2H), 8.40-8.98 (m, 2H), 7.69-7.66 (m, 2H).

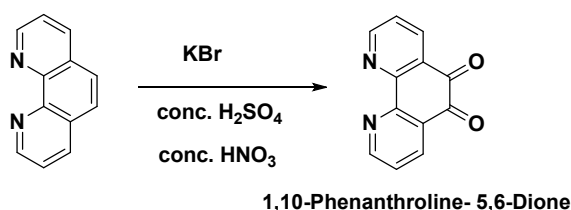

**Scheme S1:** Synthetic methodologies adopted for the synthesis of 1,10-Phenanthroline-5,6-Dione.

**Synthesis of P1:** A mixture of p-N, N dimethyl amino benzaldehyde (462 mg, 3.1 mmol), 1,10-Phenanthroline-5,6-Dione (650 mg, 3.1 mmol), and ammonium acetate (3.1 gm, 40.21 mmol) in glacial acetic acid (15.5 mL) was heated at 100°C for 12 h with continuous stirring. The hot reaction mixture was cooled to room temperature, whereupon a yellow solid was precipitated. This yellow solid was collected by filtration and washed with dilute aqueous NaHCO<sub>3</sub> solution followed by distilled water. This yellow residue was dried and purified by column chromatography on silica gel eluting with CH<sub>3</sub>OH/CHCl<sub>3</sub> (3:97, v/v). Yield = 700.05 mg, (1.97 mmol, 63.76 %) (Scheme S2). (<sup>1</sup>H NMR, DMSO-*d*<sub>6</sub>, 500 MHz, δppm): 8.98 (d, *J*=6.5 Hz, 2H), 8.92 (s, 2H), 8.08 (d, *J* = 6.5 Hz, 2H), 7.82-7.80 (m, 2H), 6.85 (d, *J* = 6.5 Hz, 2H), 2.98 (s, 6H). FTIR (CaF<sub>2</sub>, ν<sub>max</sub>, cm<sup>-1</sup>): 733, 811, 952, 1070, 1195, 1358, 1433, 1522, 1607 (Phenanthroline, C=N str), 3178 (Imidazole, N-H str).

**Synthesis of P2:** A mixture of p-chloro benzaldehyde (450 gm, 3.1 mmol), 1,10-Phenanthroline-5,6-Dione (650 mg, 3.1 mmol), and ammonium acetate (3.1g, 40.21 mmol) in glacial acetic acid (15.5 mL) was heated at 100°C for 12 h with stirring. The hot reaction mixture was cooled to room temperature, whereupon a yellow solid separated. The yellow solid was collected by filtration and washed with dilute aqueous NaHCO<sub>3</sub> solution, and finally with water. This yellow residue was dried and purified by column chromatography on silica gel eluting with CH<sub>3</sub>OH/CHCl<sub>3</sub> (3:97, v/v). Yield = 720.25 mg, (2.14 mmol, 70.24 %) (Scheme S2). (<sup>1</sup>H NMR, DMSO-*d*<sub>6</sub>, 500 MHz, δppm): 8.98 (s, 2H), 8.82 (d, *J* = 10 Hz, 2H), 8.18 (d, *J* = 10 Hz, 2H), 7.76-7.79 (m, 2H), 7.60 (d, *J* = 5 Hz, 2H). FTIR (CaF<sub>2</sub>, ν<sub>max</sub>, cm<sup>-1</sup>): 732, 802, 836, 1014, 1088, 1394, 1455, 1472, 1554 (Phenanthroline, C=N str), 3186 (Imidazole, N-H str).

**Synthesis of P3:** A mixture of p-nitro benzaldehyde (472.8 mg, 3.1 mmol), 1,10-Phenanthroline-5,6-Dione (650 mg, 3.1 mmol), and ammonium acetate (3.1 gm, 40.21 mmol) in glacial acetic acid (15.5 mL) was heated at 100°C for 12 h with stirring. The hot reaction mixture was cooled to room temperature, whereupon a brown solid separated. The yellow solid was collected by filtration and washed with dilute aqueous NaHCO<sub>3</sub> solution, and finally with water. This yellow residue was dried and purified by column chromatography on silica gel eluting with CH<sub>3</sub>OH/CHCl<sub>3</sub> (3:97, v/v). Yield = 801.41 mg, (7.10 mmol, 74.04 %) (Scheme S2). (<sup>1</sup>H NMR, DMSO-*d*<sub>6</sub>, 500 MHz, δppm): 9.00-8.99 (m, 2H), 8.92-8.90 (m, 2H), 8.53 (d, *J* = 8.5 Hz, 2H), 8.42 (d, *J* = 8.5 Hz, 2H), 7.82-7.79

(m, 2H). FTIR (CaF<sub>2</sub>, v<sub>max</sub>, cm<sup>-1</sup>): 705, 731, 804, 854, 1106, 1335, 1400, 1514, 1598 (Phenanthroline, C=N str), 3302 (Imidazole, N-H str).

**Synthesis of (P1)<sub>2</sub>Zn:** (P1)<sub>2</sub>Zn was prepared by a mixture of P1 (200mg, 0.594 mmol) and zinc chloride (52.45mg, 0.297 mmol) in dry methanol (30 mL) stirred at room temperature for 24 hours. On completion of reaction, the precipitate was separated as yellow-colored solid which was filtered, dried, and recrystallized from cold methanol. Yield: 207.62 mg (0.264mmol, 89.08%) (Scheme S2). ESI-MS (m/z): [M+1]<sup>+</sup>=745.17 (calculated); 745.70 (observed). FTIR (CaF<sub>2</sub>, v<sub>max</sub>, cm<sup>-1</sup>): 736, 816, 950, 1076, 1198, 1354, 1487, 1610 (Phenanthroline, C=N str), 3344 (Imidazole, N-H str).

**Synthesis of (P2)<sub>2</sub>Zn:** (P2)<sub>2</sub>Zn was prepared by a mixture of P2 (160 mg, 0.483 mmol) and zinc chloride (33.11 mg, 0.243 mmol) in dry methanol (30 mL) stirred at room temperature for 24 hours. On completion of reaction, the precipitate was separated as yellow-colored solid which was filtered, dried, and recrystallized from cold methanol. Yield: 140.2 mg (0.260 mmol, 87.98%) (Scheme S2). ESI-MS (m/z): [M]<sup>+</sup>=726.89 (calculated); 726.92 (observed). FTIR (CaF<sub>2</sub>, v<sub>max</sub>, cm<sup>-1</sup>): 728, 812, 1072, 1362, 1403, 1448, 1515, 1609 (Phenanthroline, C=N str), 3241 (Imidazole, N-H str).

**Synthesis of (P3)<sub>2</sub>Zn:** (P3)<sub>2</sub>Zn was prepared by a mixture of P3 (200mg, 0.594 mmol) and zinc chloride (52.45mg, 0.297 mmol) in dry methanol (30 mL) stirred at room temperature for 24 hours. On completion of reaction, the precipitate was separated as yellow-colored solid which was filtered, dried, and recrystallized from cold methanol. Yield: 224.27 mg (0.312 mmol, 84.33%) (Scheme S2). ESI-MS (m/z): [M+1]<sup>+</sup>=750.04 (calculated); 750.55 (observed). FTIR (CaF<sub>2</sub>, v<sub>max</sub>, cm<sup>-1</sup>): 699, 734, 818, 856, 1074, 1100, 1333, 1513, 1603 (Phenanthroline, C=N str), 3367 (Imidazole, N-H str).

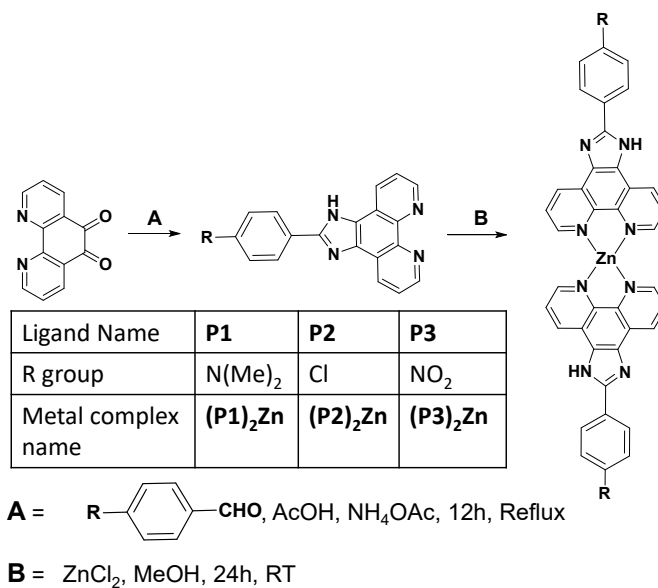

**Scheme S2:** Synthetic methodologies adopted for the synthesis of ligands (P1, P2 and P3) metal complexes ((P1)<sub>2</sub>Zn, (P2)<sub>2</sub>Zn and (P3)<sub>2</sub>Zn).

**Spectroscopic characterization:**

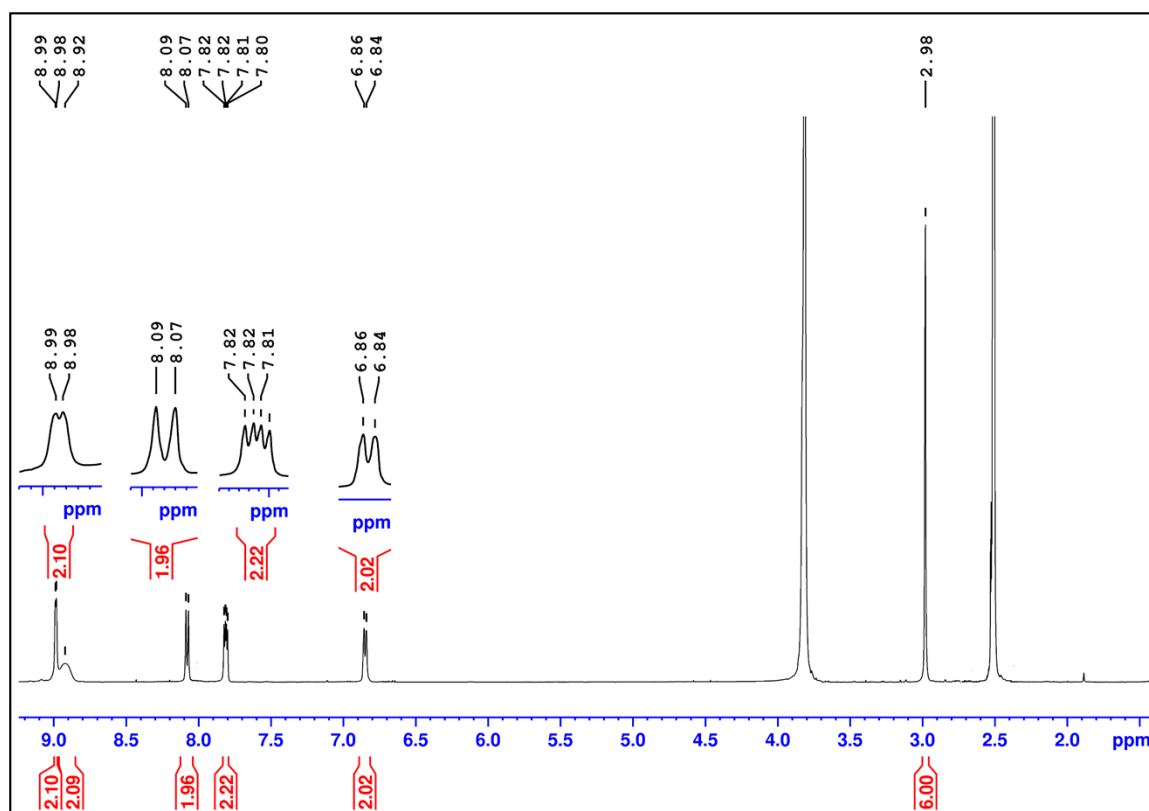

**Figure S1.** <sup>1</sup>H NMR (DMSO-*d*<sub>6</sub>, 500 MHz, δppm) of P1.

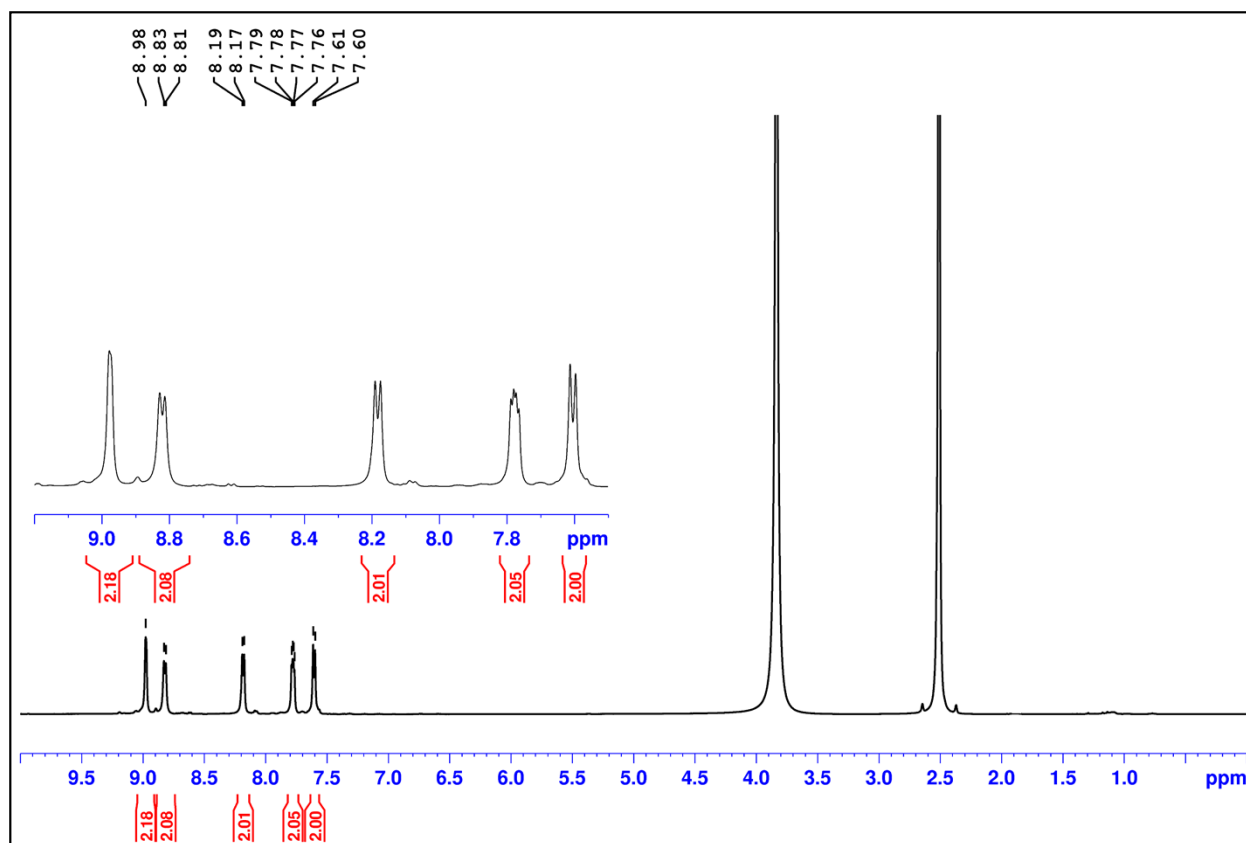

**Figure S2.**  $^1\text{H}$  NMR ( $\text{DMSO-}d_6$ , 500 MHz,  $\delta$ ppm) of P2.

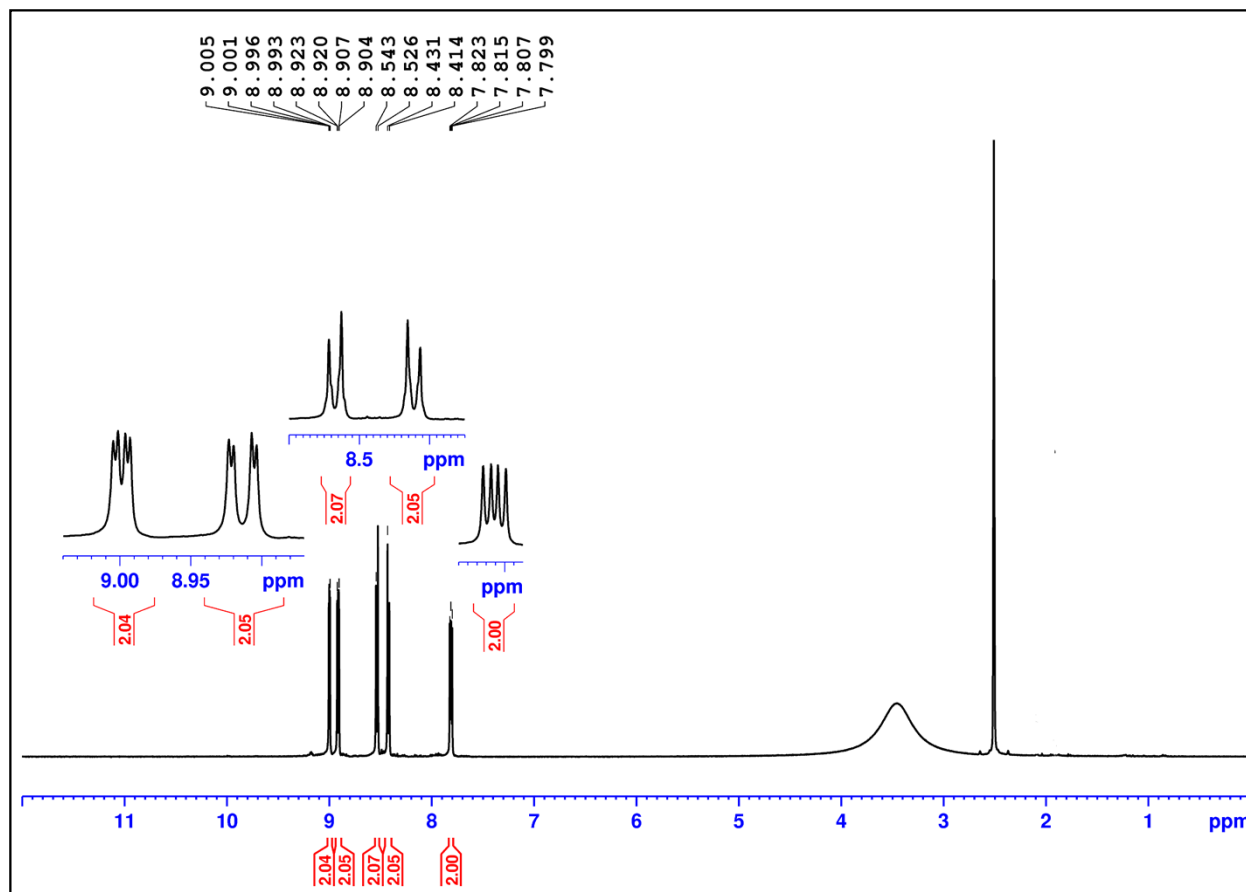

Figure S3.  $^1\text{H}$  NMR (DMSO- $d_6$ , 500 MHz,  $\delta\text{ppm}$ ) of P3.

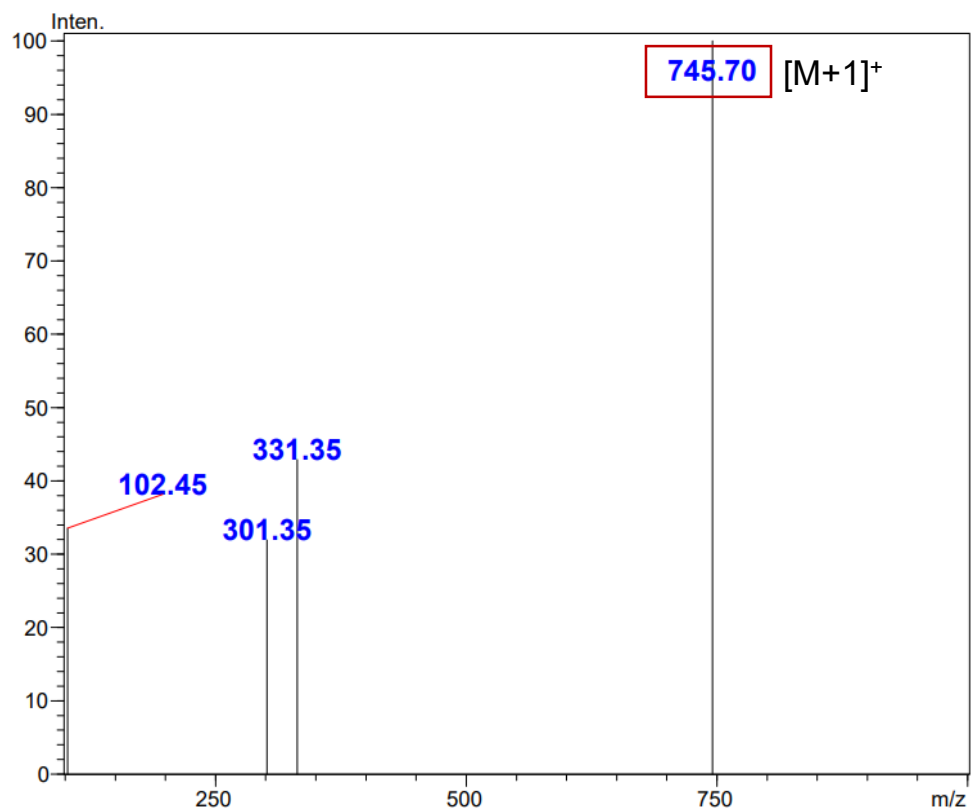

**Figure S4.** ESI Mass spectra of (P1)<sub>2</sub>Zn.

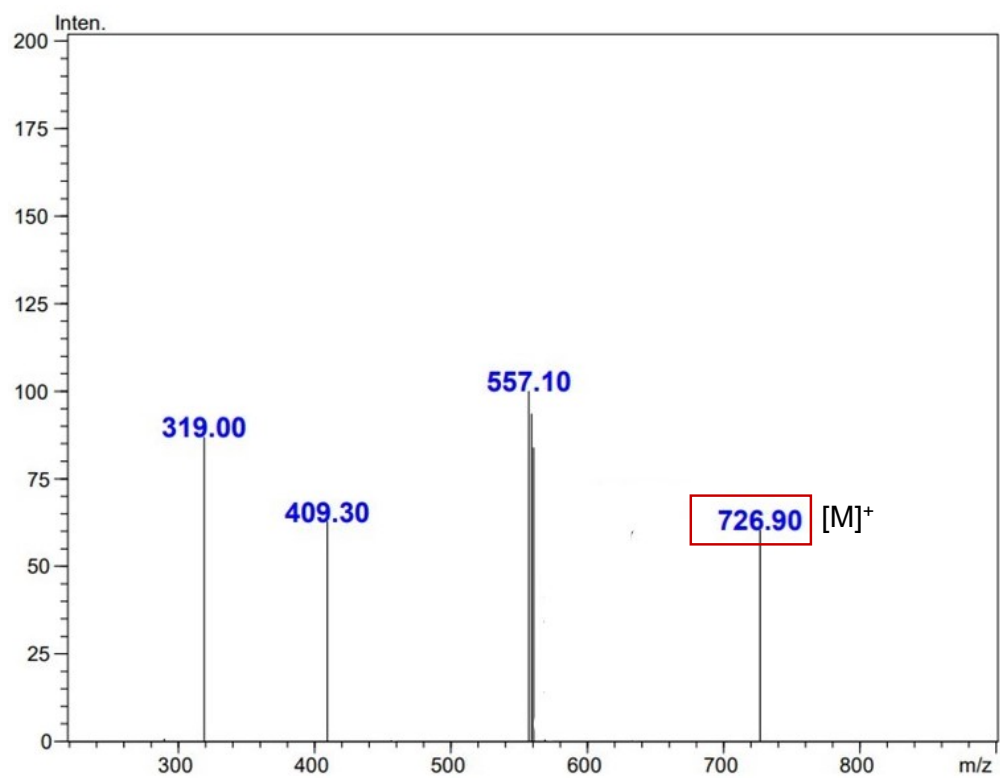

**Figure S5.** ESI Mass spectra of **(P2)<sub>2</sub>Zn**.



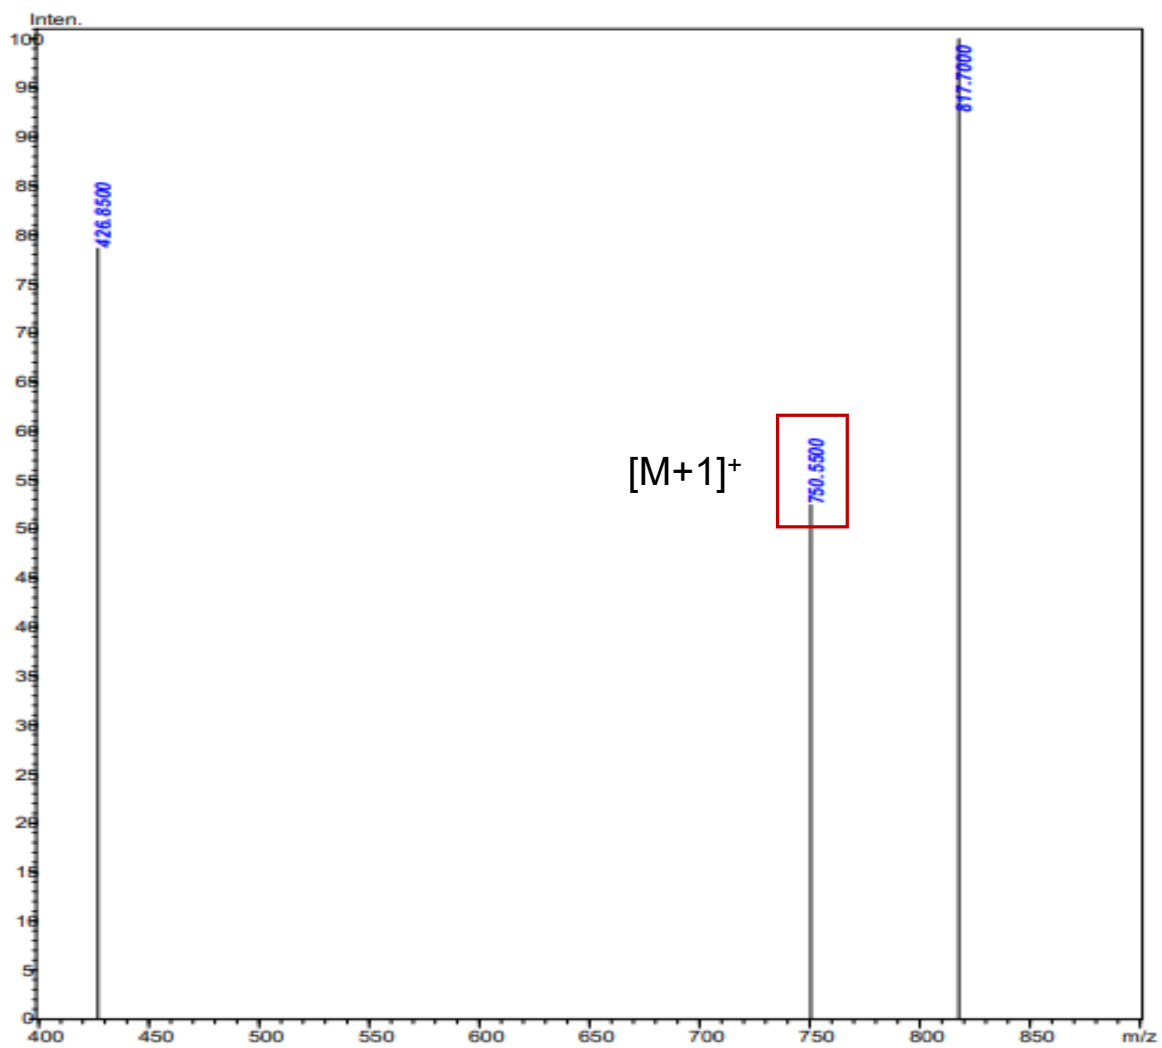

**Figure S6.** ESI Mass spectra of (P3)<sub>2</sub>Zn.

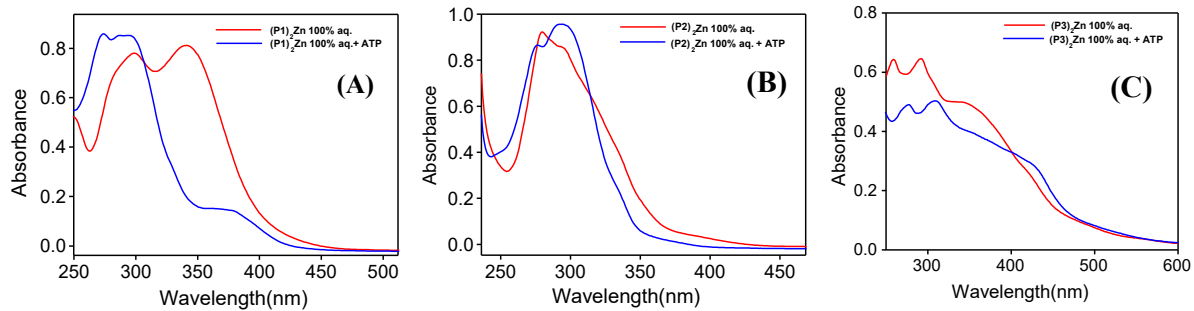

**Figure S7.** UV-Vis spectra of  $(P_n)_2Zn$  ( $n=1,2,3$ ) in absence and presence of ATP in aqueous 0.01 M HEPES buffer medium (pH = 7.4).

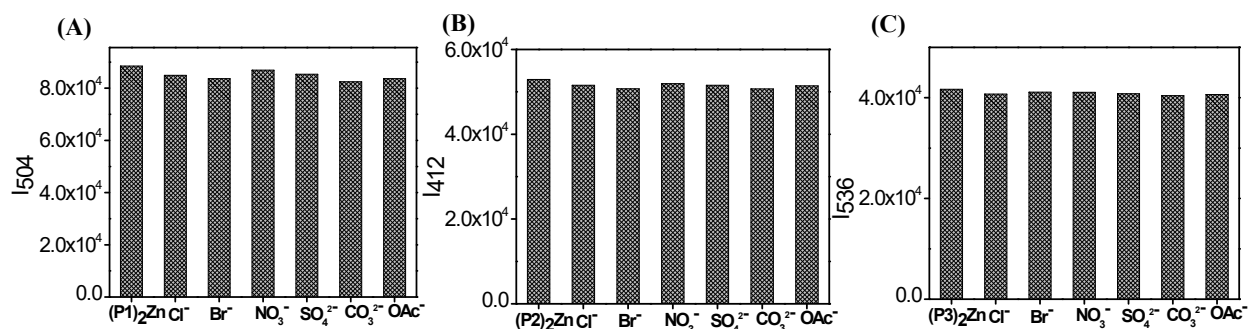

**Figure S8.** Different anions ( $Cl^-$ ,  $Br^-$ ,  $NO_3^-$ ,  $SO_4^{2-}$ ,  $CO_3^{2-}$  and  $OAc^-$ ) scanning with (A)  $(P1)_2Zn$ , (B)  $(P2)_2Zn$  and (C)  $(P3)_2Zn$ .

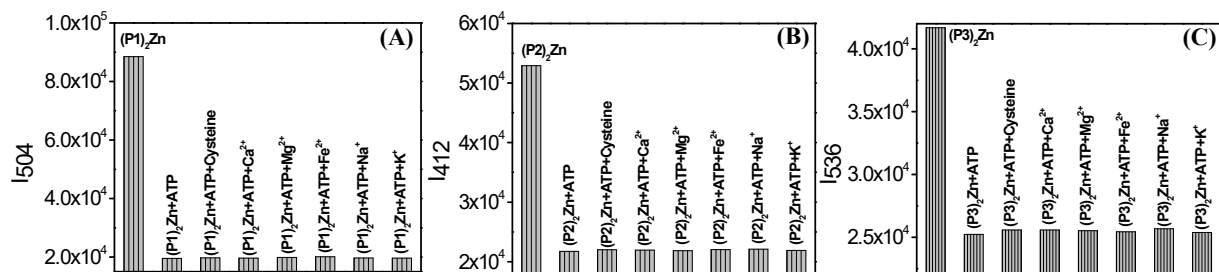

**Figure S9.** Different cations (cysteine,  $Ca^{2+}$ ,  $Mg^{2+}$ ,  $Fe^{2+}$ ,  $Na^+$  and  $K^+$ ) scanning with (A)  $(P1)_2Zn$ , (B)  $(P2)_2Zn$  and (C)  $(P3)_2Zn$ .

### Calculation of Binding constants:

Binding constant was calculated from changes in fluorescence Intensity with varying [ATP] using nonlinear least-square fitting (SI Equations 1 for 1:1 ((**Pn**)<sub>2</sub>**Zn-ATP**) (n = 1,2,3))<sup>1-5</sup>.

$$\frac{F_0}{F_c} = 1 + \left( \frac{F_1}{F_0} - 1 \right) \left( \frac{K[ATP]}{1+K[ATP]} \right) \dots\dots\dots (\text{SIEq.1})$$

K in SI Equation 1 correspond to binding constant for 1:1 complex formation. In SI Equation 1, F<sub>0</sub> is the fluorescence intensities at specific wavelengths of (**Pn**)<sub>2</sub>**Zn** (λ<sub>Ems</sub> = 504 nm for (**P1**)<sub>2</sub>**Zn**, λ<sub>Ems</sub> = 412 nm for (**P2**)<sub>2</sub>**Zn** and λ<sub>Ems</sub> = 536 nm for (**P3**)<sub>2</sub>**Zn**) in absence of ATP. F<sub>1</sub> is maximum fluorescence intensities at these specific wavelengths of (**Pn**)<sub>2</sub>**Zn** in presence of ATP. F<sub>c</sub> is the fluorescence intensity of (**Pn**)<sub>2</sub>**Zn** at particular wavelengths (λ<sub>Ems</sub> = 504 nm for (**P1**)<sub>2</sub>**Zn**, λ<sub>Ems</sub> = 412 nm for (**P2**)<sub>2</sub>**Zn** and λ<sub>Ems</sub> = 536 nm for (**P3**)<sub>2</sub>**Zn**) for a specific [ATP] and this value is restricted for concentration range of (0 – 0.008 M) for SI Equation 1. The concentration of the ATP is denoted by [ATP].

### References:

- 1 I. Alfonso, M. I. Burguete, F. Galindo, S. V. Luis and L. Vigarà, *J. Org. Chem.*, 2009, **74**, 6130–6142.
- 2 B. D. Wagner, N. Stojanovic, A. I. Day and R. J. Blanch, *J. Phys. Chem. B*, 2003, **107**, 10741–10746.
- 3 S. Nigam and G. Durocher, *J. Phys. Chem.*, 1996, **100**, 7135–7142.
- 4 B. D. Wagner and G. J. McManus, *Anal. Biochem.*, 2003, **317**, 233–239.
- 5 B. D. Wagner and P. J. MacDonald, *J. Photochem. Photobiol. A Chem.*, 1998, **114**, 151–157.

**Table S1.** Calculated absorption of **(Pn)<sub>2</sub>Zn** (n=1,2,3) complexes in aqueous media at TD-B3LYP level of theory along with experimental values.

|                           | State           | $\lambda(\text{nm})/E(\text{eV})$ | Oscillator | Main configuration                                                | Assign                                                                                                                                                                                                                                                                                                                                                             | $\lambda_{\text{exp}}$ (nm) |
|---------------------------|-----------------|-----------------------------------|------------|-------------------------------------------------------------------|--------------------------------------------------------------------------------------------------------------------------------------------------------------------------------------------------------------------------------------------------------------------------------------------------------------------------------------------------------------------|-----------------------------|
| <b>(P1)<sub>2</sub>Zn</b> | S <sub>26</sub> | 293/ 4.23                         | 0.3036     | H-7→L+1 (25%)<br>H-6 →L (26%)<br>H-3 →L+3 (17%)<br>H-2 →L+2 (17%) | PhenA/PhenB →PhenA/PhenB (ILCT)<br>PhenA/PhenB →PhenA/PhenB (ILCT)<br>a-PhN (CH <sub>3</sub> ) <sub>2</sub> /b-PhN (CH <sub>3</sub> ) <sub>2</sub> →PhenA/PhenB (LLCT)<br>a-PhN(CH <sub>3</sub> ) <sub>2</sub> /b-PhN(CH <sub>3</sub> ) <sub>2</sub> →PhenA/PhenB (LLCT)                                                                                           | 294                         |
|                           | S <sub>25</sub> | 294/ 4.22                         | 0.5200     | H-7→L (24%)<br>H-6→L+1 (24%)<br>H-3 →L+2 (16%)<br>H-2 →L+3(16%)   | PhenA/PhenB →PhenA/PhenB (ILCT)<br>PhenA/PhenB →PhenA/PhenB (ILCT)<br>a-PhN(CH <sub>3</sub> ) <sub>2</sub> /b-PhN(CH <sub>3</sub> ) <sub>2</sub> →PhenA/PhenB (LLCT)<br>a-PhN(CH <sub>3</sub> ) <sub>2</sub> /b-PhN(CH <sub>3</sub> ) <sub>2</sub> →PhenA/PhenB (LLCT)                                                                                             |                             |
|                           | S <sub>9</sub>  | 373/ 3.32                         | 2.1911     | H-1→L+5 (49%)<br>H→L+4 (49%)                                      | a-PhN(CH <sub>3</sub> ) <sub>2</sub> /b-PhN(CH <sub>3</sub> ) <sub>2</sub> →a-PhN(CH <sub>3</sub> ) <sub>2</sub> /b-PhN(CH <sub>3</sub> ) <sub>2</sub> /PhenA/PhenB (ILCT,LLCT)<br>a-PhN(CH <sub>3</sub> ) <sub>2</sub> /b-PhN(CH <sub>3</sub> ) <sub>2</sub> →a-PhN(CH <sub>3</sub> ) <sub>2</sub> /b-PhN(CH <sub>3</sub> ) <sub>2</sub> /PhenA/PhenB (ILCT,LLCT) | 349                         |
| <b>(P2)<sub>2</sub>Zn</b> | S <sub>23</sub> | 274/4.52                          | 0.8955     | H-7→L (11%)<br>H-6→L+1 (11%)<br>H-3→L+3 (27%)<br>H-2→L+2 (27%)    | a-PhCl/b-PhCl→Zn/PhenA/PhenB (LMCT/LLCT)<br>a-PhCl/b-PhCl→Zn/PhenA/PhenB (LMCT/LLCT)<br>a-PhCl/b-PhCl →PhenA/PhenB (LLCT)<br>a-PhCl/b-PhCl →Zn/PhenA/PhenB (LMCT/LLCT)                                                                                                                                                                                             | 275                         |

|  |                 |           |        |                                                                |                                                                                                                                                                                                                                                                                              |     |
|--|-----------------|-----------|--------|----------------------------------------------------------------|----------------------------------------------------------------------------------------------------------------------------------------------------------------------------------------------------------------------------------------------------------------------------------------------|-----|
|  | S <sub>17</sub> | 288/ 4.31 | 0.2343 | H-7→L (27%)<br>H-6→L+1 (27%)<br>H-3→L+3 (11%)<br>H-2→L+2 (11%) | a-PhCl/b-PhCl→Zn/PhenA/PhenB (LMCT/LLCT)<br>a-PhCl/b-PhCl→Zn/PhenA/PhenB (LMCT/LLCT)<br>a-PhCl/b-PhCl →PhenA/PhenB (LLCT)<br>a-PhCl/b-PhCl →Zn/PhenA/PhenB (LMCT/LLCT)                                                                                                                       | 298 |
|  | S <sub>14</sub> | 300/ 4.13 | 0.2574 | H-3→L (42%)<br>H-2→L+1 (39%)                                   | a-PhCl/b-PhCl →Zn/PhenA/PhenB (LMCT/LLCT)<br>a-PhCl/b-PhCl →Zn/PhenA/PhenB (LMCT/LLCT)                                                                                                                                                                                                       |     |
|  | S <sub>9</sub>  | 321/3.87  | 1.9269 | H-1→L+4 (15%)<br>H-1→L+5 (31%)<br>H→L+4 (31%)<br>H→L+5 (15%)   | a-PhCl/b-PhCl/PhenA/PhenB →Zn/PhenA/PhenB/a-PhCl/b-PhCl (LMCT, ILCT)<br>a-PhCl/b-PhCl/PhenA/PhenB →Zn/PhenA/PhenB/a-PhCl/b-PhCl (ILCT, LMCT)<br>a-PhCl/b-PhCl/PhenA/PhenB →Zn/PhenA/PhenB/a-PhCl/b-PhCl (LMCT, ILCT)<br>a-PhCl/b-PhCl/PhenA/PhenB →Zn/PhenA/PhenB/a-PhCl/b-PhCl (LMCT, ILCT) | 340 |
|  | S <sub>5</sub>  | 359/ 3.45 | 0.3793 | H-1→L+2 (14%)<br>H-1→L+3 (29%)<br>H→L+2 (30%)<br>H→L+3 (14%)   | a-PhCl/b-PhCl/PhenA/PhenB →Zn/PhenA/PhenB (LMCT/ILCT)<br>a-PhCl/b-PhCl/PhenA/PhenB →PhenA/PhenB (LLCT/ILCT)<br>a-PhCl/b-PhCl/PhenA/PhenB →Zn/PhenA/PhenB (LMCT/LLCT/ILCT)<br>a-PhCl/b-PhCl/PhenA/PhenB →PhenA/PhenB (LLCT/ILCT)                                                              | 360 |

|                           |                 |           |        |                                                                           |                                                                                                                                                                                                                                                                                                                                     |            |
|---------------------------|-----------------|-----------|--------|---------------------------------------------------------------------------|-------------------------------------------------------------------------------------------------------------------------------------------------------------------------------------------------------------------------------------------------------------------------------------------------------------------------------------|------------|
| <b>(P3)<sub>2</sub>Zn</b> | S <sub>31</sub> | 4.61/ 269 | 1.1632 | H-7→L (14%)<br>H-6→L (14%)<br>H-3→L+4 (19%)<br>H-2→L+5 (17%)              | b-PhNO <sub>2</sub> →Zn/PhenA/PhenB (LMCT/LLCT)<br>a-PhNO <sub>2</sub> → Zn/PhenA/PhenB (LMCT/LLCT)<br>a-PhNO <sub>2</sub> /b-PhNO <sub>2</sub> → PhenA/PhenB/ a-PhNO <sub>2</sub> /b-PhNO <sub>2</sub> (LLCT/ILCT)<br>a-PhNO <sub>2</sub> /b-PhNO <sub>2</sub> → PhenA/PhenB/ a-PhNO <sub>2</sub> /b-PhNO <sub>2</sub> (LLCT/ILCT) | 240<br>270 |
|                           | S <sub>29</sub> | 4.57/271  | 0.1147 | H-5→L+2 (39%)<br>H-4→L+3 (40%)                                            | b-PhNO <sub>2</sub> → PhenA/PhenB (LLCT)<br>a-PhNO <sub>2</sub> → PhenA/PhenB (LLCT)                                                                                                                                                                                                                                                |            |
|                           | S <sub>27</sub> | 4.37/ 284 | 0.1036 | H-2→L+5 (13%)<br>H-1→L+7 (16%)<br>H→L+6 (31%)                             | a-PhNO <sub>2</sub> /b-PhNO <sub>2</sub> → PhenA/PhenB/ a-PhNO <sub>2</sub> /b-PhNO <sub>2</sub> (LLCT/ILCT)<br>a-PhNO <sub>2</sub> / PhenA→ PhenA/PhenB/ a-PhNO <sub>2</sub> /b-PhNO <sub>2</sub> (LLCT/ILCT)<br>b-PhNO <sub>2</sub> / PhenB→ PhenA/PhenB/ a-PhNO <sub>2</sub> /b-PhNO <sub>2</sub> (LLCT/ILCT)                    |            |
|                           | S <sub>21</sub> | 4.21/294  | 0.4241 | H-3→L+2 (21%)<br>H-2→L+3 (22%)                                            | a-PhNO <sub>2</sub> /b-PhNO <sub>2</sub> → PhenA/PhenB (LLCT)<br>a-PhNO <sub>2</sub> /b-PhNO <sub>2</sub> → PhenA/PhenB (LLCT)                                                                                                                                                                                                      | 350        |
|                           | S <sub>3</sub>  | 3.24/ 383 | 1.2025 | H-1→L+1 (22%)<br>H-1→L+2 (15%)<br>H→L (25%)<br>H→L+2 (11%)<br>H→L+3 (15%) | a-PhNO <sub>2</sub> / PhenA→ Zn/PhenA/PhenB (LMCT/LLCT/ILCT)<br>a-PhNO <sub>2</sub> / PhenA→ PhenA/PhenB (LLCT/ILCT)<br>b-PhNO <sub>2</sub> / PhenB→ Zn/PhenA/PhenB (LMCT/LLCT)<br>b-PhNO <sub>2</sub> / PhenB→ PhenA/PhenB (ILCT/LLCT)<br>b-PhNO <sub>2</sub> / PhenB→ PhenA/PhenB (ILCT/LLCT)                                     |            |

|  |                |           |        |                                                                              |                                                                                                                                                                                                                                                                 |     |
|--|----------------|-----------|--------|------------------------------------------------------------------------------|-----------------------------------------------------------------------------------------------------------------------------------------------------------------------------------------------------------------------------------------------------------------|-----|
|  | S <sub>1</sub> | 3.09/ 402 | 0.6661 | H-1→L+1<br>(25%)<br><br>H-1→L+2<br>(14%)<br><br>H→L (26%)<br><br>H→L+3 (14%) | a-PhNO <sub>2</sub> / PhenA→ Zn/PhenA/PhenB<br>(LMCT/LLCT/ILCT)<br><br>a-PhNO <sub>2</sub> / PhenA→ PhenA/PhenB<br>(ILCT/LLCT)<br><br>b-PhNO <sub>2</sub> / PhenB→ Zn/PhenA/PhenB<br>(LMCT/LLCT)<br><br>b-PhNO <sub>2</sub> / PhenB→ PhenA/PhenB<br>(ILCT/LLCT) | 420 |
|--|----------------|-----------|--------|------------------------------------------------------------------------------|-----------------------------------------------------------------------------------------------------------------------------------------------------------------------------------------------------------------------------------------------------------------|-----|

\* PhenA(B), a(b)-PhPn represent the imidazoline fused phenanthroline and substituted phenyl units, respectively of ligand A(B)

**Table S2.** Calculated absorption of **(Pn)<sub>2</sub>Zn** (**n=1,2,3**) complexes in aqueous media at TD-PBE1PBE level of theory along with experimental values.

|                           | State           | λ(nm)/E(eV) | Oscillator | Main configuration                                                                   | Assign                                                                                                                                                                                                                                                                                                                                                                                                                                                            | λ <sub>exp</sub> (nm) |
|---------------------------|-----------------|-------------|------------|--------------------------------------------------------------------------------------|-------------------------------------------------------------------------------------------------------------------------------------------------------------------------------------------------------------------------------------------------------------------------------------------------------------------------------------------------------------------------------------------------------------------------------------------------------------------|-----------------------|
| <b>(P1)<sub>2</sub>Zn</b> | S <sub>23</sub> | 282/ 4.40   | 0.3185     | H-7→L (19%)<br><br>H-6 →L+1<br>(17%)                                                 | PhenA/PhenB →PhenA/PhenB (ILCT)<br><br>PhenA/PhenB →PhenA/PhenB (ILCT)                                                                                                                                                                                                                                                                                                                                                                                            | 294                   |
|                           | S <sub>20</sub> | 286/ 4.34   | 0.2336     | H-5→L (28%)<br><br>H-4→L+1<br>(27%)<br><br>H-3 →L+3<br>(17%)<br><br>H-2→L+2<br>(17%) | PhenA/a-PhN(CH <sub>3</sub> ) <sub>2</sub> /b-PhN(CH <sub>3</sub> ) <sub>2</sub> /PhenB<br>→PhenA/PhenB (ILCT/LLCT)<br><br>a-PhN(CH <sub>3</sub> ) <sub>2</sub> /b-PhN(CH <sub>3</sub> ) <sub>2</sub> /PhenA/PhenB<br>→PhenA/PhenB (LLCT, ILCT)<br><br>a-PhN(CH <sub>3</sub> ) <sub>2</sub> /b-PhN(CH <sub>3</sub> ) <sub>2</sub> →PhenA/PhenB<br>(LLCT)<br><br>a-PhN(CH <sub>3</sub> ) <sub>2</sub> /b-PhN(CH <sub>3</sub> ) <sub>2</sub> →PhenA/PhenB<br>(LLCT) |                       |
|                           | S <sub>19</sub> | 286/ 4.34   | 0.2724     | H-5→L+1(26%)                                                                         | PhenA/a-PhN(CH <sub>3</sub> ) <sub>2</sub> /b-PhN(CH <sub>3</sub> ) <sub>2</sub> /PhenB→PhenA/PhenB (LLCT, ILCT)<br><br>a-PhN(CH <sub>3</sub> ) <sub>2</sub> /b-PhN(CH <sub>3</sub> ) <sub>2</sub> /PhenA/PhenB                                                                                                                                                                                                                                                   |                       |

|                           |                 |           |        |                                                                                                                    |                                                                                                                                                                                                                                                                                                                                                                        |     |
|---------------------------|-----------------|-----------|--------|--------------------------------------------------------------------------------------------------------------------|------------------------------------------------------------------------------------------------------------------------------------------------------------------------------------------------------------------------------------------------------------------------------------------------------------------------------------------------------------------------|-----|
|                           |                 |           |        | H-4 →L (27%)<br><br>H-3 →L+2 (18%)<br><br>H-2 →L+3 (18%)                                                           | →PhenA/PhenB (LLCT, ILCT)<br><br>a-PhN(CH <sub>3</sub> ) <sub>2</sub> /b-PhN(CH <sub>3</sub> ) <sub>2</sub> →PhenA/PhenB (LLCT)<br><br>a-PhN(CH <sub>3</sub> ) <sub>2</sub> /b-PhN(CH <sub>3</sub> ) <sub>2</sub> →PhenA/PhenB (LLCT)                                                                                                                                  |     |
|                           | S <sub>9</sub>  | 359/ 3.45 | 2.2719 | H-1→L+5 (49%)<br><br>H→L+4 (49%)                                                                                   | a-PhN(CH <sub>3</sub> ) <sub>2</sub> /b-PhN(CH <sub>3</sub> ) <sub>2</sub> →a-PhN(CH <sub>3</sub> ) <sub>2</sub> /b-PhN(CH <sub>3</sub> ) <sub>2</sub> /PhenA/PhenB (ILCT,LLCT)<br><br>a-PhN(CH <sub>3</sub> ) <sub>2</sub> /b-PhN(CH <sub>3</sub> ) <sub>2</sub> →a-PhN(CH <sub>3</sub> ) <sub>2</sub> /b-PhN(CH <sub>3</sub> ) <sub>2</sub> /PhenA/PhenB (ILCT,LLCT) | 349 |
| <b>(P2)<sub>2</sub>Zn</b> | S <sub>17</sub> | 276/ 4.50 | 0.4522 | H-7→L (11%)<br><br>H-6→L+1 (11%)<br><br>H-5→L (12%)<br><br>H-4→L+1 (13%)<br><br>H-3→L+3 (20%)<br><br>H-2→L+2 (20%) | a-PhCl/b-PhCl→Zn/PhenA/PhenB (LMCT/LLCT)<br><br>a-PhCl/b-PhCl→Zn/PhenA/PhenB (LMCT/LLCT)<br><br>a-PhCl/b-PhCl/PhenA/PhenB →Zn/PhenA/PhenB (LLCT/LMCT/ILCT)<br><br>a-PhCl/b-PhCl/PhenA/PhenB →Zn/PhenA/PhenB (LLCT/LMCT/ILCT)<br><br>a-PhCl/b-PhCl →PhenA/PhenB (LLCT)<br><br>a-PhCl/b-PhCl →Zn/PhenA/PhenB (LMCT/LLCT)                                                 | 275 |
|                           | S <sub>12</sub> | 291/ 4.27 | 0.3293 | H-3→L (40%)<br><br>H-2→L+1 (39%)                                                                                   | a-PhCl/b-PhCl →Zn/PhenA/PhenB (LMCT/LLCT)<br><br>a-PhCl/b-PhCl →Zn/PhenA/PhenB (LMCT/LLCT)                                                                                                                                                                                                                                                                             | 298 |
|                           | S <sub>11</sub> | 291/ 4.27 | 0.3261 | H-3→L+1 (40%)<br><br>H-2→L (39%)                                                                                   | a-PhCl/b-PhCl →Zn/PhenA/PhenB (LMCT/LLCT)<br><br>a-PhCl/b-PhCl →Zn/PhenA/PhenB                                                                                                                                                                                                                                                                                         |     |



|                           |                 |           |        |                                                              |                                                                                                                                                                                                                                                                                 |     |
|---------------------------|-----------------|-----------|--------|--------------------------------------------------------------|---------------------------------------------------------------------------------------------------------------------------------------------------------------------------------------------------------------------------------------------------------------------------------|-----|
|                           |                 |           |        |                                                              | (LMCT/LLCT)                                                                                                                                                                                                                                                                     |     |
|                           | S <sub>5</sub>  | 345/ 3.59 | 0.4540 | H-1→L+2 (30%)<br>H-1→L+3 (14%)<br>H→L+2 (14%)<br>H→L+3 (29%) | a-PhCl/b-PhCl/PhenA/PhenB →Zn/PhenA/PhenB (LMCT/LLCT/ILCT)<br>a-PhCl/b-PhCl/PhenA/PhenB →PhenA/PhenB (LLCT/ILCT)<br>a-PhCl/b-PhCl/PhenA/PhenB →Zn/PhenA/PhenB (LMCT/LLCT/ILCT)<br>a-PhCl/b-PhCl/PhenA/PhenB →PhenA/PhenB (LLCT/ILCT)                                            | 340 |
|                           | S <sub>4</sub>  | 367/ 3.37 | 0.0000 | H-1→L (16%)<br>H-1→L+1 (33%)<br>H→L (33%)<br>H→L+1 (16%)     | a-PhCl/b-PhCl/PhenA/PhenB →Zn/PhenA/PhenB (LMCT/LLCT/ILCT)<br>a-PhCl/b-PhCl/PhenA/PhenB →Zn/PhenA/PhenB (LMCT/LLCT/ILCT)<br>a-PhCl/b-PhCl/PhenA/PhenB →Zn/PhenA/PhenB (LMCT/LLCT/ILCT)<br>a-PhCl/b-PhCl/PhenA/PhenB →Zn/PhenA/PhenB (LMCT/LLCT/ILCT)                            | 360 |
| <b>(P3)<sub>2</sub>Zn</b> | S <sub>39</sub> | 5.03/ 247 | 0.0170 | H-7→L (24%)<br>H-6→L+1 (23%)                                 | b-PhNO <sub>2</sub> →Zn/PhenA/PhenB (LMCT/LLCT)<br>a-PhNO <sub>2</sub> → Zn/PhenA/PhenB (LMCT/LLCT)                                                                                                                                                                             | 240 |
|                           | S <sub>29</sub> | 4.80/ 259 | 1.2040 | H-7→L (11%)<br>H-3→L+4 (17%)<br>H-2→L+5 (17%)                | b-PhNO <sub>2</sub> →Zn/PhenA/PhenB (LMCT/LLCT)<br>a-PhNO <sub>2</sub> /b-PhNO <sub>2</sub> → PhenA/PhenB/ a-PhNO <sub>2</sub> /b-PhNO <sub>2</sub> (LLCT/ILCT)<br>a-PhNO <sub>2</sub> /b-PhNO <sub>2</sub> → PhenA/PhenB/ a-PhNO <sub>2</sub> /b-PhNO <sub>2</sub> (LLCT/ILCT) |     |
|                           | S <sub>25</sub> | 4.56/ 272 | 0.0625 | H-2→L+5 (12%)<br>H→L+6(28%)                                  | a-PhNO <sub>2</sub> /b-PhNO <sub>2</sub> → PhenA/PhenB/ a-PhNO <sub>2</sub> /b-PhNO <sub>2</sub> (LLCT/ILCT)<br>b-PhNO <sub>2</sub> / PhenB→ PhenA/PhenB/ a-PhNO <sub>2</sub> /b-PhNO <sub>2</sub> (LLCT/ILCT)                                                                  |     |

|  |                 |           |        |                                                                                                                         |                                                                                                                                                                                                                                                                                                                                                                                               |     |
|--|-----------------|-----------|--------|-------------------------------------------------------------------------------------------------------------------------|-----------------------------------------------------------------------------------------------------------------------------------------------------------------------------------------------------------------------------------------------------------------------------------------------------------------------------------------------------------------------------------------------|-----|
|  | S <sub>18</sub> | 4.33/ 286 | 0.3668 | H-3→L+3<br>(33%)<br><br>H-2→L+2<br>(33%)                                                                                | a-PhNO <sub>2</sub> /b-PhNO <sub>2</sub> → PhenA/PhenB (LLCT)<br><br>a-PhNO <sub>2</sub> /b-PhNO <sub>2</sub> → PhenA/PhenB (LLCT)                                                                                                                                                                                                                                                            | 270 |
|  | S <sub>17</sub> | 4.33/ 286 | 0.3960 | H-3→L+3<br>(30%)<br><br>H-2→L+3<br>(30%)                                                                                | a-PhNO <sub>2</sub> /b-PhNO <sub>2</sub> → PhenA/PhenB (LLCT)<br><br>a-PhNO <sub>2</sub> /b-PhNO <sub>2</sub> → PhenA/PhenB (LLCT)                                                                                                                                                                                                                                                            |     |
|  | S <sub>3</sub>  | 3.41/364  | 1.3587 | H-1→L+1<br>(19%)<br><br>H-1→L+2<br>(17%)<br><br>H-1→L+3<br>(12%)<br><br>H→L (21%)<br><br>H→L+2 (13%)<br><br>H→L+3 (17%) | a-PhNO <sub>2</sub> / PhenA→ Zn/PhenA/PhenB<br>(LMCT/LLCT/ILCT)<br><br>a-PhNO <sub>2</sub> / PhenA→ PhenA/PhenB<br>(LLCT/ILCT)<br><br>a-PhNO <sub>2</sub> / PhenA→ PhenA/PhenB<br>(LLCT/ILCT)<br><br>b-PhNO <sub>2</sub> / PhenB→ Zn/PhenA/PhenB<br>(LMCT/LLCT)<br><br>b-PhNO <sub>2</sub> / PhenB→ PhenA/PhenB<br>(ILCT/LLCT)<br><br>b-PhNO <sub>2</sub> / PhenB→ PhenA/PhenB<br>(ILCT/LLCT) | 350 |
|  | S <sub>1</sub>  | 3.22/ 385 | 0.6854 | H-1→L+1<br>(29%)<br><br>H-1→L+2<br>(11%)<br><br>H→L (30%)                                                               | a-PhNO <sub>2</sub> / PhenA→ Zn/PhenA/PhenB<br>(LMCT/LLCT/ILCT)<br><br>a-PhNO <sub>2</sub> / PhenA→ PhenA/PhenB<br>(ILCT/LLCT)<br><br>b-PhNO <sub>2</sub> / PhenB→ Zn/PhenA/PhenB                                                                                                                                                                                                             | 420 |

|  |  |  |  |             |                                                                      |  |
|--|--|--|--|-------------|----------------------------------------------------------------------|--|
|  |  |  |  | H→L+3 (12%) | (LMCT/LLCT)<br>b-PhNO <sub>2</sub> /PhenB→PhenA/PhenB<br>(ILCT/LLCT) |  |
|--|--|--|--|-------------|----------------------------------------------------------------------|--|

\* PhenA(B), a(b)-PhPn represent the imidazoline fused phenanthroline and substituted phenyl units, respectively of ligand A(B)

**Table S3.** Calculated absorption of **(Pn)<sub>2</sub>Zn (n=1,2,3)** complexes in aqueous media at TD-M06-2X level of theory along with experimental values.

|                           | State           | λ(nm)/E(eV) | Oscillator | Main configuration                 | Assign                                                                                                                                                                                                                                                                                                                                                                 | λ <sub>exp</sub> (nm) |
|---------------------------|-----------------|-------------|------------|------------------------------------|------------------------------------------------------------------------------------------------------------------------------------------------------------------------------------------------------------------------------------------------------------------------------------------------------------------------------------------------------------------------|-----------------------|
| <b>(P1)<sub>2</sub>Zn</b> | S <sub>13</sub> | 275/ 4.51   | 0.2296     | H-5→L (27%)<br><br>H-4→L+1 (27%)   | PhenA/a-PhN(CH <sub>3</sub> ) <sub>2</sub> /b-PhN(CH <sub>3</sub> ) <sub>2</sub> /PhenB→PhenA/PhenB (LLCT, ILCT)<br><br>a-PhN(CH <sub>3</sub> ) <sub>2</sub> /b-PhN(CH <sub>3</sub> ) <sub>2</sub> /PhenA/PhenB→PhenA/PhenB (LLCT, ILCT)                                                                                                                               | 294                   |
|                           | S <sub>7</sub>  | 313/ 3.96   | 1.7008     | H-1→L+5 (39%)<br><br>H→L+4 (39%)   | a-PhN(CH <sub>3</sub> ) <sub>2</sub> /b-PhN(CH <sub>3</sub> ) <sub>2</sub> →a-PhN(CH <sub>3</sub> ) <sub>2</sub> /b-PhN(CH <sub>3</sub> ) <sub>2</sub> /PhenA/PhenB (ILCT,LLCT)<br><br>a-PhN(CH <sub>3</sub> ) <sub>2</sub> /b-PhN(CH <sub>3</sub> ) <sub>2</sub> →a-PhN(CH <sub>3</sub> ) <sub>2</sub> /b-PhN(CH <sub>3</sub> ) <sub>2</sub> /PhenA/PhenB (ILCT,LLCT) |                       |
|                           | S <sub>3</sub>  | 350/ 3.54   | 1.1359     | H-1→L+3 (40%)<br><br>H→L+2 (40%)   | a-PhN(CH <sub>3</sub> ) <sub>2</sub> /b-PhN(CH <sub>3</sub> ) <sub>2</sub> →PhenA/PhenB (LLCT)<br><br>a-PhN(CH <sub>3</sub> ) <sub>2</sub> /b-PhN(CH <sub>3</sub> ) <sub>2</sub> →PhenA/PhenB (LLCT)                                                                                                                                                                   | 349                   |
| <b>(P2)<sub>2</sub>Zn</b> | S <sub>11</sub> | 250 / 4.95  | 1.0126     | H-3→L+3 (35%)<br><br>H-2→L+2 (35%) | a-PhCl/b-PhCl→PhenA/PhenB (LLCT)<br><br>a-PhCl/b-PhCl→Zn/PhenA/PhenB (LMCT/LLCT)                                                                                                                                                                                                                                                                                       | 275                   |
|                           | S <sub>10</sub> | 268/4.63    | 0.4898     | H-3→L (29%)<br><br>H-2→L+1 (29%)   | a-PhCl/b-PhCl→Zn/PhenA/PhenB (LMCT/LLCT)<br><br>a-PhCl/b-PhCl→Zn/PhenA/PhenB (LMCT/LLCT)                                                                                                                                                                                                                                                                               |                       |

|  |                |           |        |                                                                          |                                                                                                                                                                                                                                                                                                                          |            |
|--|----------------|-----------|--------|--------------------------------------------------------------------------|--------------------------------------------------------------------------------------------------------------------------------------------------------------------------------------------------------------------------------------------------------------------------------------------------------------------------|------------|
|  | S <sub>9</sub> | 268/4.63  | 0.5645 | H-3→L+1 (29%)<br><br>H-2→L (29%)                                         | a-PhCl/b-PhCl →Zn/PhenA/PhenB (LMCT/LLCT)<br><br>a-PhCl/b-PhCl→Zn/PhenA/PhenB (LMCT/LLCT)                                                                                                                                                                                                                                |            |
|  | S <sub>5</sub> | 282/ 4.39 | 1.5494 | H-1→L+4 (22%)<br><br>H-1→L+5 (14%)<br><br>H→L+4(14%)<br><br>H→L+5 (22%)  | a-PhCl/b-PhCl/PhenA/PhenB →Zn/a-PhCl/b-PhCl/PhenA/PhenB (LMCT/LLCT/ILCT)<br><br>a-PhCl/b-PhCl/PhenA/PhenB →Zn/a-PhCl/b-PhCl/PhenA/PhenB (LMCT/LLCT/ILCT)<br><br>a-PhCl/b-PhCl/PhenA/PhenB →Zn/a-PhCl/b-PhCl/PhenA/PhenB (LMCT/LLCT/ILCT)<br><br>a-PhCl/b-PhCl/PhenA/PhenB →Zn/a-PhCl/b-PhCl/PhenA/PhenB (LMCT/LLCT/ILCT) | 298        |
|  | S <sub>3</sub> | 308/ 4.03 | 0.7425 | H-1→L+2 (25%)<br><br>H-1→L+3 (16%)<br><br>H→L+2 (16%)<br><br>H→L+3 (25%) | a-PhCl/b-PhCl/PhenA/PhenB →Zn/PhenA/PhenB (LMCT/LLCT/ILCT)<br><br>a-PhCl/b-PhCl/PhenA/PhenB →PhenA/PhenB (LLCT/ILCT)<br><br>a-PhCl/b-PhCl/PhenA/PhenB →Zn/PhenA/PhenB (LMCT/LLCT/ILCT)<br><br>a-PhCl/b-PhCl/PhenA/PhenB →PhenA/PhenB (LLCT/ILCT)                                                                         |            |
|  | S <sub>1</sub> | 346/3.59  | 0.3926 | H-1→L (28%)<br><br>H-1 →L+1(18%)<br><br>H →L (18%)<br><br>H→L+1 (28%)    | a-PhCl/b-PhCl/PhenA/PhenB →Zn/PhenA/PhenB (LMCT/LLCT/ILCT)<br><br>a-PhCl/b-PhCl/PhenA/PhenB →Zn/PhenA/PhenB (LMCT/LLCT/ILCT)<br><br>a-PhCl/b-PhCl/PhenA/PhenB →Zn/PhenA/PhenB (LMCT/LLCT/ILCT)<br><br>a-PhCl/b-PhCl/PhenA/PhenB →Zn/PhenA/PhenB (LMCT/LLCT/ILCT)                                                         | 340<br>360 |

|                           |                 |           |        |                                                              |                                                                                                                                                                                                                                                                                                                                                                                                      |            |
|---------------------------|-----------------|-----------|--------|--------------------------------------------------------------|------------------------------------------------------------------------------------------------------------------------------------------------------------------------------------------------------------------------------------------------------------------------------------------------------------------------------------------------------------------------------------------------------|------------|
| <b>(P3)<sub>2</sub>Zn</b> | S <sub>21</sub> | 5.36/ 231 | 0.6037 | H-1→L+6 (17%)<br>H-1→L+7 (15%)<br>H→L+6 (16%)<br>H→L+7 (18%) | a-PhNO <sub>2</sub> / PhenA→ PhenA/PhenB/ a-PhNO <sub>2</sub> /b-PhNO <sub>2</sub> (LLCT/ILCT)<br>a-PhNO <sub>2</sub> / PhenA→ PhenA/PhenB/ a-PhNO <sub>2</sub> /b-PhNO <sub>2</sub> (LLCT/ILCT)<br>b-PhNO <sub>2</sub> / PhenB→ PhenA/PhenB/ a-PhNO <sub>2</sub> /b-PhNO <sub>2</sub> (LLCT/ILCT)<br>b-PhNO <sub>2</sub> / PhenB→ PhenA/PhenB/ a-PhNO <sub>2</sub> /b-PhNO <sub>2</sub> (LLCT/ILCT) | 240        |
|                           | S <sub>17</sub> | 4.93/ 252 | 0.4260 | H+3→L+5 (22%)<br>H+2→L+4 (22%)                               | a-PhNO <sub>2</sub> /b-PhNO <sub>2</sub> → PhenA/PhenB/ a-PhNO <sub>2</sub> /b-PhNO <sub>2</sub> (LLCT/ILCT)<br>a-PhNO <sub>2</sub> /b-PhNO <sub>2</sub> → PhenA/PhenB/ a-PhNO <sub>2</sub> /b-PhNO <sub>2</sub> (LLCT/ILCT)                                                                                                                                                                         |            |
|                           | S <sub>11</sub> | 4.66/ 266 | 0.5779 | H+3→L+3 (15%)<br>H+2→L+2 (19%)<br>H→L+5 (14%)                | a-PhNO <sub>2</sub> /b-PhNO <sub>2</sub> → PhenA/PhenB (LLCT)<br>a-PhNO <sub>2</sub> /b-PhNO <sub>2</sub> → PhenA/PhenB (LLCT)<br>b-PhNO <sub>2</sub> / PhenB→ PhenA/PhenB/ a-PhNO <sub>2</sub> /b-PhNO <sub>2</sub> (LLCT/ILCT)                                                                                                                                                                     | 270        |
|                           | S <sub>3</sub>  | 3.67/ 337 | 1.3678 | H-1→L+2 (18%)<br>H-1→L+3 (17%)<br>H→L+2 (21%)<br>H→L+3 (20%) | a-PhNO <sub>2</sub> / PhenA→ PhenA/PhenB (LLCT)<br>a-PhNO <sub>2</sub> / PhenA→ PhenA/PhenB (LLCT)<br>b-PhNO <sub>2</sub> / PhenB→ PhenA/PhenB (LLCT)<br>b-PhNO <sub>2</sub> / PhenB→ PhenA/PhenB (LLCT)                                                                                                                                                                                             | 350<br>420 |
|                           | S <sub>1</sub>  | 3.95/ 314 | 1.0172 | H-1→L+1 (40%)<br>H→L (41%)                                   | a-PhNO <sub>2</sub> / PhenA→ Zn/PhenA/PhenB (LMCT/LLCT/ILCT)<br>b-PhNO <sub>2</sub> / PhenB→ Zn/PhenA/PhenB (LMCT/LLCT/ILCT)                                                                                                                                                                                                                                                                         |            |

\* Phena(B), a(b)-PhLn represent the imidazoline fused phenanthroline and substituted phenyl units, respectively of ligand A(B)

**Table S4.** Calculated absorption of ((Pn)<sub>2</sub>Zn-ATP) (n=1,2,3) complexes in aqueous media at TD-B3LYP level of theory along with experimental values.

|                               | State           | $\lambda(\text{nm})/E(\text{eV})$ | Oscillator | Main configuration                                                         | Assign                                                                                                                                                                                                                                                                                                                 | $\lambda_{\text{exp}}$ (nm) |
|-------------------------------|-----------------|-----------------------------------|------------|----------------------------------------------------------------------------|------------------------------------------------------------------------------------------------------------------------------------------------------------------------------------------------------------------------------------------------------------------------------------------------------------------------|-----------------------------|
| <b>(P1)<sub>2</sub>Zn-ATP</b> | S <sub>36</sub> | 277/4.48                          | 0.1014     | H-13→L (20%)<br><br>H-11→L+1 (31%)<br><br>H-6→L+1 (12%)                    | Zn/ATP/ PhenA/PhenB →PhenA (MLCT/LLCT/ILCT)<br><br>Zn/ATP→PhenA/PhenB (MLCT/LLCT)<br><br>ATP →PhenA/PhenB (LLCT)                                                                                                                                                                                                       | 265<br>287                  |
|                               | S <sub>35</sub> | 277/4.47                          | 0.1505     | H-6→L+2 (16%)<br><br>H-5→L+3 (22%)                                         | ATP →PhenA/PhenB (LLCT)<br><br>ATP/Zn/PhenB/b-PhN(CH <sub>3</sub> ) <sub>2</sub> →PhenB/b-PhN(CH <sub>3</sub> ) <sub>2</sub> (MLCT/LLCT/ILCT)                                                                                                                                                                          |                             |
|                               | S <sub>34</sub> | 278/4.47                          | 0.2473     | H-6→L+1 (21%)                                                              | ATP →PhenA/PhenB (LLCT)                                                                                                                                                                                                                                                                                                |                             |
|                               | S <sub>32</sub> | 279/ 4.45                         | 0.7078     | H-6→L+1 (12%)<br><br>H-6→L+3 (12%)<br><br>H-5→L+2 (13%)<br><br>H→L+8 (17%) | ATP →PhenA/PhenB (LLCT)<br><br>ATP →PhenB/b-PhN(CH <sub>3</sub> ) <sub>2</sub> (LLCT)<br><br>ATP/Zn/PhenB/b-PhN(CH <sub>3</sub> ) <sub>2</sub> →PhenA/PhenB/a-PhN(CH <sub>3</sub> ) <sub>2</sub> (MLCT/LLCT/ILCT)<br><br>PhenB/b-PhN(CH <sub>3</sub> ) <sub>2</sub> →PhenA/a-PhN(CH <sub>3</sub> ) <sub>2</sub> (LLCT) |                             |
|                               | S <sub>31</sub> | 280/ 4.43                         | 0.2072     | H-5→L+1 (39%)<br><br>H-4→L+3 (18%)<br><br>H-3→L+3 (14%)                    | ATP/Zn/PhenB/b-PhN(CH <sub>3</sub> ) <sub>2</sub> →PhenA/PhenB (LLCT/ILCT/MLCT)<br><br>ATP/ PhenB/b-PhN(CH <sub>3</sub> ) <sub>2</sub> →PhenB/b-PhN(CH <sub>3</sub> ) <sub>2</sub> (LLCT/ILCT)<br><br>Zn/ATP→PhenB/b-PhN(CH <sub>3</sub> ) <sub>2</sub> (MLCT/LLCT)                                                    |                             |

|                                    |                 |           |        |                                            |                                                                                                                                                                                                                      |                   |
|------------------------------------|-----------------|-----------|--------|--------------------------------------------|----------------------------------------------------------------------------------------------------------------------------------------------------------------------------------------------------------------------|-------------------|
|                                    | S <sub>10</sub> | 341/3.64  | 0.5088 | H-1→L+4<br>(26%)<br><br>H-1→L+5<br>(62%)   | PhenA/a-PhN(CH <sub>3</sub> ) <sub>2</sub> →PhenA/a-PhN(CH <sub>3</sub> ) <sub>2</sub><br>(ILCT)<br><br>PhenA/a-PhN(CH <sub>3</sub> ) <sub>2</sub> →PhenB/b-PhN(CH <sub>3</sub> ) <sub>2</sub><br>(LLCT)             | 375               |
|                                    | S <sub>9</sub>  | 347/ 3.57 | 1.5421 | H→ L+4 (83%)                               | PhenB/b-PhN(CH <sub>3</sub> ) <sub>2</sub> →PhenA/a-PhN(CH <sub>3</sub> ) <sub>2</sub><br>(LLCT)                                                                                                                     |                   |
|                                    | S <sub>6</sub>  | 401/ 3.09 | 0.1990 | H-1→L+2<br>(56%)<br><br>H-1 → L+3<br>(38%) | PhenA/a-PhN(CH <sub>3</sub> ) <sub>2</sub> →PhenA/PhenB/a-<br>PhN(CH <sub>3</sub> ) <sub>2</sub> (ILCT/LLCT)<br><br>PhenA/a-PhN(CH <sub>3</sub> ) <sub>2</sub> →PhenB/b-PhN(CH <sub>3</sub> ) <sub>2</sub><br>(LLCT) |                   |
|                                    | S <sub>5</sub>  | 405/ 3.06 | 0.2002 | H→ L+2 (73%)<br><br><br>H→ L+3 (24%)       | PhenB/b-PhN(CH <sub>3</sub> ) <sub>2</sub> →PhenA/PhenB/a-<br>PhN(CH <sub>3</sub> ) <sub>2</sub> (ILCT/LLCT)<br><br>PhenB/b-PhN(CH <sub>3</sub> ) <sub>2</sub> →PhenB/b-PhN(CH <sub>3</sub> ) <sub>2</sub><br>(LLCT) |                   |
| <b>(P2)<sub>2</sub>Zn-<br/>ATP</b> | S <sub>25</sub> | 275/4.51  | 0.1958 | H-4 →L+2<br>(52%)<br><br>H-3 →L+3<br>(13%) | ATP/Zn/PhenA →PhenA<br>(MLCT/ILCT/LLCT)<br><br>PhenA/a-PhCl→PhenA/a-PhCl/PhenB/b-<br>PhCl (LLCT/ILCT)                                                                                                                | 250<br>279<br>295 |
|                                    | S <sub>24</sub> | 276/ 4.48 | 0.5036 | H-3→ L+3<br>(40%)                          | PhenA/a-PhCl→PhenA/a-PhCl/PhenB/b-<br>PhCl (LLCT/ILCT)                                                                                                                                                               |                   |
|                                    | S <sub>19</sub> | 283/ 4.39 | 0.3599 | H-4→ L (62%)<br><br><br>H-3→ L+1<br>(11%)  | ATP/Zn/PhenA →PhenA<br>(LLCT/MLCT/ILCT)<br><br>PhenA/a-PhCl →PhenA/a-PhCl (ILCT)                                                                                                                                     |                   |
|                                    | S <sub>18</sub> | 285/4.36  | 0.1307 | H-4→ L (12%)<br><br><br>H-3→ L+1<br>(64%)  | ATP/Zn/PhenA →PhenA<br>(LLCT/MLCT/ILCT)<br><br>PhenA/a-PhCl →PhenA/a-PhCl (ILCT)                                                                                                                                     |                   |
|                                    | S <sub>12</sub> | 308/ 4.02 | 0.3932 | H→ L+5 (64%)                               | PhenB/b-PhCl →PhenB/b-PhCl (ILCT)                                                                                                                                                                                    |                   |
|                                    | S <sub>10</sub> | 313/ 3.96 | 0.9664 | H-1 → L+4                                  | PhenA/a-PhCl →PhenA/PhenB/a-PhCl/b-                                                                                                                                                                                  |                   |

|                               |                 |           |        |                                 |                                                                                                           |            |
|-------------------------------|-----------------|-----------|--------|---------------------------------|-----------------------------------------------------------------------------------------------------------|------------|
|                               |                 |           |        | (70%)<br>H→L+4(11%)             | PhCl (ILCT/LLCT)<br>PhenB/b-PhCl →PhenA/PhenB/a-PhCl/b-PhCl (ILCT/LLCT)                                   |            |
|                               | S <sub>6</sub>  | 335/ 3.70 | 0.2538 | H→L+2 (11%)<br>H →L+3 (68%)     | PhenB/b-PhCl → PhenA (LLCT)<br>PhenB/b-PhCl →PhenA/a-PhCl/PhenB/b-PhCl (LLCT/ILCT)                        | 340        |
|                               | S <sub>5</sub>  | 337/3.68  | 0.3874 | H-1→L+2 (72%)<br>H→L+2 (12%)    | PhenA/a-PhCl →PhenA (ILCT/LLCT)<br>PhenB/b-PhCl →PhenA (LLCT)                                             |            |
|                               | S <sub>1</sub>  | 3.30/ 376 | 0.1632 | H-1→L (55%)<br>H→L+1 (42%)      | PhenA/a-PhCl →PhenA (LLCT/ILCT)<br>PhenB/b-PhCl →PhenA/a-PhCl (LLCT)                                      |            |
| <b>(P3)<sub>2</sub>Zn-ATP</b> | S <sub>37</sub> | 282/4.40  | 0.2255 | H-4 →L+4 (13%)<br>H-1→L+6 (51%) | ATP →PhenB (LLCT)<br>PhenB/b-PhNO <sub>2</sub> → PhenA/a-PhNO <sub>2</sub> (LLCT)                         |            |
|                               | S <sub>34</sub> | 283/ 4.39 | 0.1541 | H-3 →L+3 (43%)<br>H→L+7 (16%)   | Zn/ATP → PhenA/a-PhNO <sub>2</sub> /PhenB (LLCT)<br>ATP→ a-PhNO <sub>2</sub> (LLCT)                       | 260<br>312 |
|                               | S <sub>11</sub> | 331/ 3.74 | 0.0325 | H-3 →L+1 (73%)<br>H →L+5 (17%)  | Zn/ATP → b-PhNO <sub>2</sub> /PhenB (MLCT/LLCT)<br>ATP→ b-PhNO <sub>2</sub> /PhenB (LLCT)                 | 330        |
|                               | S <sub>1</sub>  | 411/3.02  | 1.3259 | H-1 →L (24%)<br>H →L+1 (70%)    | b-PhNO <sub>2</sub> /PhenB → a-PhNO <sub>2</sub> /PhenA (LLCT)<br>ATP → b-PhNO <sub>2</sub> /PhenB (LLCT) | 440        |

\* PhenA(B), a(b)-PhPn represent the imidazoline fused phenanthroline and substituted phenyl units, respectively of ligand A(B)

**Table S5.** Calculated absorption of ((Pn)<sub>2</sub>Zn-ATP) (n=1,2,3) complexes in aqueous media at TD-PBE1PBE level of theory along with experimental values.



|                               | State           | $\lambda(\text{nm})/E(\text{eV})$ | Oscillator | Main configuration                          | Assign                                                                                                                                                                                                      | $\lambda_{\text{exp}}$ (nm) |
|-------------------------------|-----------------|-----------------------------------|------------|---------------------------------------------|-------------------------------------------------------------------------------------------------------------------------------------------------------------------------------------------------------------|-----------------------------|
| <b>(P1)<sub>2</sub>Zn-ATP</b> | S <sub>35</sub> | 267/ 4.63                         | 0.1722     | H-6→L+1 (48%)<br>H-4→L+3 (14%)              | ATP → PhenA/PhenB (LLCT)<br>ATP/ PhenB/b-PhN(CH <sub>3</sub> ) <sub>2</sub> → PhenB/b-PhN(CH <sub>3</sub> ) <sub>2</sub> (LLCT/ILCT)                                                                        | 265<br>287                  |
|                               | S <sub>27</sub> | 271/4.57                          | 0.5235     | H-6→L (12%)<br>H-5→L (29%)<br>H-3→L+3 (12%) | ATP → PhenA (LLCT)<br>ATP/Zn/PhenB/b-PhN(CH <sub>3</sub> ) <sub>2</sub> → PhenA (MLCT/LLCT)<br>Zn/ATP → PhenB/b-PhN(CH <sub>3</sub> ) <sub>2</sub> (MLCT/LLCT)                                              |                             |
|                               | S <sub>26</sub> | 274/ 4.53                         | 0.2158     | H-6→L (17%)<br>H-5→L (19%)<br>H-3→L+2 (42%) | ATP → PhenA (LLCT)<br>ATP/Zn/PhenB/b-PhN(CH <sub>3</sub> ) <sub>2</sub> → PhenA (MLCT/LLCT)<br>Zn/ATP → PhenA/PhenB/a-PhN(CH <sub>3</sub> ) <sub>2</sub> (MLCT/LLCT)                                        |                             |
|                               | S <sub>10</sub> | 329/3.76                          | 0.5808     | H-1→L+4 (21%)<br>H-1→L+5 (67%)              | PhenA/a-PhN(CH <sub>3</sub> ) <sub>2</sub> → PhenA/a-PhN(CH <sub>3</sub> ) <sub>2</sub> (ILCT)<br>PhenA/a-PhN(CH <sub>3</sub> ) <sub>2</sub> → PhenB/b-PhN(CH <sub>3</sub> ) <sub>2</sub> (LLCT)            | 375                         |
|                               | S <sub>9</sub>  | 335/3.70                          | 1.5186     | H→L+4 (81%)                                 | PhenB/b-PhN(CH <sub>3</sub> ) <sub>2</sub> → PhenA/a-PhN(CH <sub>3</sub> ) <sub>2</sub> (LLCT)                                                                                                              |                             |
|                               | S <sub>6</sub>  | 381/ 3.26                         | 0.2339     | H-1→L+2 (81%)<br>H-1→L+3 (43%)              | PhenA/a-PhN(CH <sub>3</sub> ) <sub>2</sub> → PhenA/PhenB/a-PhN(CH <sub>3</sub> ) <sub>2</sub> (LLCT/ILCT)<br>PhenA/a-PhN(CH <sub>3</sub> ) <sub>2</sub> → PhenB/b-PhN(CH <sub>3</sub> ) <sub>2</sub> (LLCT) |                             |
|                               | S <sub>5</sub>  | 384/ 3.22                         | 0.2708     | H→L+2 (65%)<br>H→L+3 (31%)                  | PhenB/b-PhN(CH <sub>3</sub> ) <sub>2</sub> → PhenA/PhenB/a-PhN(CH <sub>3</sub> ) <sub>2</sub> (ILCT/LLCT)<br>PhenB/b-PhN(CH <sub>3</sub> ) <sub>2</sub> → PhenB/b-PhN(CH <sub>3</sub> ) <sub>2</sub> (ILCT) |                             |

|                               |                 |          |        |                                                       |                                                                                                                                        |                   |
|-------------------------------|-----------------|----------|--------|-------------------------------------------------------|----------------------------------------------------------------------------------------------------------------------------------------|-------------------|
| <b>(P2)<sub>2</sub>Zn-ATP</b> | S <sub>40</sub> | 243/5.10 | 0.0616 | H-4 → L+4<br>(48%)                                    | ATP/Zn/PhenA → PhenA/PhenB/a-PhCl/b-PhCl (MLCT/LLCT/ILCT)                                                                              |                   |
|                               | S <sub>23</sub> | 4.65/267 | 0.1493 | H-4→L+2<br>(39%)<br><br>H-3→L+3<br>(21%)              | ATP/Zn/PhenA → PhenA<br>(MCLT/LLCT/ILCT)<br><br>PhenA/a-PhCl → PhenA/a-PhCl/PhenB/b-PhCl (LLCT/ILCT)                                   |                   |
|                               | S <sub>22</sub> | 4.62/268 | 0.5921 | H-4→L+2<br>(16%)<br><br>H-3→L+3<br>(36%)              | ATP/Zn/PhenA → PhenA<br>(MLCT/ILCT/LLCT)<br><br>PhenA/a-PhCl → PhenA/a-PhCl/PhenB/b-PhCl (ILCT/LLCT)                                   |                   |
|                               | S <sub>16</sub> | 4.52/274 | 0.4474 | H-4→L(54%)<br><br><br>H-3→L(13%)                      | ATP/Zn/PhenA → PhenA<br>(MLCT/ILCT/LLCT)<br><br>PhenA/a-PhCl → PhenA (ILCT/LLCT)                                                       |                   |
|                               | S <sub>14</sub> | 4.47/278 | 0.2139 | H-3→L(15%)<br><br>H-3→ L+1<br>(40%)<br><br>H→L+4(11%) | PhenA/a-PhCl → PhenA (ILCT/LLCT)<br><br>PhenA/a-PhCl → PhenA/a-PhCl (ILCT)<br><br>PhenB/b-PhCl → PhenA/PhenB/a-PhCl/b-PhCl (ILCT/LLCT) | 250<br>279<br>295 |
|                               | S <sub>10</sub> | 4.15/299 | 0.4099 | H-1→L+3<br>(29%)<br><br>H→L+5 (57%)                   | PhenA/a-PhCl → PhenA/a-PhCl/PhenB/b-PhCl (LLCT/ILCT)<br><br>PhenB/b-PhCl → PhenB/b-PhCl (LLCT/ILCT)                                    |                   |
|                               | S <sub>8</sub>  | 4.08/304 | 0.8212 | H-1→ L+4<br>(60%)<br><br>H →L+4 (13)                  | PhenA/a-PhCl → PhenA/PhenB/a-PhCl/b-PhCl (ILCT/LLCT)<br><br>PhenB/b-PhCl → PhenA/PhenB/a-PhCl/b-PhCl (ILCT/LLCT)                       |                   |
|                               | S <sub>7</sub>  | 4.07/305 | 0.1264 | H-1→L+2<br>(11%)<br><br>H→L+2 (70%)                   | PhenA/a-PhCl → PhenA (ILCT/LLCT)<br><br>PhenB/b-PhCl → PhenA (LLCT)                                                                    | 340               |

|                               |                 |           |        |                                               |                                                                                                                              |            |     |
|-------------------------------|-----------------|-----------|--------|-----------------------------------------------|------------------------------------------------------------------------------------------------------------------------------|------------|-----|
|                               | S <sub>6</sub>  | 3.83/324  | 0.2326 | H→L+3 (66%)                                   | PhenB/b-PhCl → PhenA/a-PhCl/PhenB/b-PhCl (LLCT/ILCT)                                                                         |            |     |
|                               | S <sub>5</sub>  | 3.81/326  | 0.4165 | H-1→L+2 (62%)                                 | PhenA/a-PhCl → PhenA (LLCT/ILCT)                                                                                             |            |     |
|                               | S <sub>1</sub>  | 3.43/361  | 0.2079 | H-1→L(56%)<br>H→L+1 (40%)                     | PhenA/a-PhCl → PhenA (LLCT/ILCT)<br>PhenB/b-PhCl → PhenA/a-PhCl (LLCT)                                                       |            |     |
| <b>(P3)<sub>2</sub>Zn-ATP</b> | S <sub>40</sub> | 4.74/ 261 | 0.3444 | H-7→L (43%)                                   | PhenA/a-PhNO <sub>2</sub> → a-PhNO <sub>2</sub> /PhenA                                                                       | 260<br>312 |     |
|                               | S <sub>32</sub> | 4.56/ 272 | 0.4958 | H-4 → L+2 (38%)<br>H-1→L+6 (12%)              | ATP →PhenA (LLCT)<br>b-PhNO <sub>2</sub> /PhenB → PhenA/a-PhNO <sub>2</sub> (LLCT)                                           |            |     |
|                               | S <sub>30</sub> | 4.50/ 275 | 0.2649 | H-3→L+2 (16%)<br>H-3→L+3 (43%)<br>H→L+5 (13%) | Zn/ATP → PhenA (MLCT/LLCT)<br>Zn/ATP → PhenA/a-PhNO <sub>2</sub> /PhenB (MLCT/LLCT)<br>ATP→b-PhNO <sub>2</sub> /PhenB (LLCT) |            |     |
|                               | S <sub>13</sub> | 3.94/ 315 | 0.0353 | H-3→L+1 (26%)<br>H→L+5 (43%)                  | Zn/ATP → b-PhNO <sub>2</sub> /PhenB (MLCT/LLCT)<br>ATP→ b-PhNO <sub>2</sub> /PhenB (LLCT)                                    |            |     |
|                               | S <sub>2</sub>  | 3.24/383  | 0.1441 | H-1→L (58%)<br>H→L+1 (38%)                    | b-PhNO <sub>2</sub> /PhenB → a-PhNO <sub>2</sub> /PhenA (LLCT)<br>ATP→ b-PhNO <sub>2</sub> /PhenB (LLCT)                     |            | 330 |
|                               | S <sub>1</sub>  | 3.20/ 387 | 1.6000 | H-1→L (35%)<br>H→L+1 (57%)                    | b-PhNO <sub>2</sub> /PhenB → a-PhNO <sub>2</sub> /PhenA (LLCT)<br>ATP→ b-PhNO <sub>2</sub> /PhenB (LLCT)                     |            | 440 |

\* PhenA(B), a(b)-PhPn represent the imidazoline fused phenanthroline and substituted phenyl units, respectively of ligand A(B)

**Table S6.** Calculated absorption of ((Pn)<sub>2</sub>Zn-ATP) (n=1,2,3) complexes in aqueous media at TD-M06-2X level of theory along with experimental values.

| State | λ(nm)/E(eV) | Oscillator | Main | Assign | λ <sub>exp</sub> |
|-------|-------------|------------|------|--------|------------------|
|-------|-------------|------------|------|--------|------------------|

|                               |                 |           |        | configuration                                                    |                                                                                                                                                                                                                                                                                              | (nm)       |
|-------------------------------|-----------------|-----------|--------|------------------------------------------------------------------|----------------------------------------------------------------------------------------------------------------------------------------------------------------------------------------------------------------------------------------------------------------------------------------------|------------|
| <b>(P1)<sub>2</sub>Zn-ATP</b> | S <sub>16</sub> | 4.80/ 259 | 0.3024 | H-6→L+1 (26%)<br>H-5→L (11%)                                     | ATP → PhenA/PhenB (LLCT)<br><br>ATP/Zn/PhenB/b-PhN(CH <sub>3</sub> ) <sub>2</sub> → PhenA (MLCT/LLCT)                                                                                                                                                                                        | 265<br>287 |
|                               | S <sub>15</sub> | 4.77/ 260 | 0.1154 | H-5→L (13%)<br><br>H-1→L+2 (11%)<br>H-1→L+3 (32%)                | ATP/Zn/PhenB/b-PhN(CH <sub>3</sub> ) <sub>2</sub> → PhenA (MLCT/LLCT)<br><br>PhenA/a-PhN(CH <sub>3</sub> ) <sub>2</sub> → PhenA/PhenB/a-PhN(CH <sub>3</sub> ) <sub>2</sub> (LLCT/ILCT)<br><br>PhenA/a-PhN(CH <sub>3</sub> ) <sub>2</sub> → PhenB/b-PhN(CH <sub>3</sub> ) <sub>2</sub> (LLCT) |            |
|                               | S <sub>13</sub> | 4.73/262  | 0.1554 | H-4→L+1 (13%)<br><br>H→L+3 (22%)                                 | ATP/ PhenB/b-PhN(CH <sub>3</sub> ) <sub>2</sub> → PhenA/PhenB (LLCT/ILCT)<br><br>PhenB/b-PhN(CH <sub>3</sub> ) <sub>2</sub> → PhenB/b-PhN(CH <sub>3</sub> ) <sub>2</sub> (ILCT)                                                                                                              |            |
|                               | S <sub>9</sub>  | 4.67/265  | 0.1323 | H-6→L (12%)<br><br>H-5→L+1 (17%)<br>H-5→L+1 (12%)<br>H-3→L (15%) | ATP → PhenA (LLCT)<br><br>ATP/Zn/PhenB/b-PhN(CH <sub>3</sub> ) <sub>2</sub> → PhenA/PhenB (LLCT/MLCT/ILCT)<br><br>ATP/Zn/PhenB/b-PhN(CH <sub>3</sub> ) <sub>2</sub> → PhenA/PhenB (LLCT/MLCT/ILCT)<br><br>Zn/ATP→ PhenA (MLCT/LLCT)                                                          |            |
|                               | S <sub>6</sub>  | 4.27/290  | 0.5958 | H-1→L+4 (20%)<br><br>H-1→L+5 (52%)                               | PhenA/a-PhN(CH <sub>3</sub> ) <sub>2</sub> → PhenA/a-PhN(CH <sub>3</sub> ) <sub>2</sub> (ILCT)<br><br>PhenA/a-PhN(CH <sub>3</sub> ) <sub>2</sub> → PhenB/b-PhN(CH <sub>3</sub> ) <sub>2</sub> (LLCT)                                                                                         |            |
|                               | S <sub>5</sub>  | 4.21/ 294 | 0.8526 | H→L+4 (55%)<br><br>H→L+5 (17%)                                   | PhenB/b-PhN(CH <sub>3</sub> ) <sub>2</sub> → PhenA/a-PhN(CH <sub>3</sub> ) <sub>2</sub> (LLCT)<br><br>PhenB/b-PhN(CH <sub>3</sub> ) <sub>2</sub> → PhenB/b-PhN(CH <sub>3</sub> ) <sub>2</sub> (ILCT)                                                                                         |            |
|                               | S <sub>4</sub>  | 3.89/ 319 | 0.4586 | H-1→L+2                                                          | PhenA/a-PhN(CH <sub>3</sub> ) <sub>2</sub> → PhenA/PhenB/a-                                                                                                                                                                                                                                  |            |

|                               |                 |           |        |                                                        |                                                                                                                                                                                                        |            |
|-------------------------------|-----------------|-----------|--------|--------------------------------------------------------|--------------------------------------------------------------------------------------------------------------------------------------------------------------------------------------------------------|------------|
|                               |                 |           |        | (38%)<br>H-1→L+3<br>(43%)                              | PhN(CH <sub>3</sub> ) <sub>2</sub> (LLCT/ILCT)<br>PhenA/a-PhN(CH <sub>3</sub> ) <sub>2</sub> → PhenB/b-PhN(CH <sub>3</sub> ) <sub>2</sub><br>(LLCT)                                                    | 375        |
|                               | S <sub>1</sub>  | 3.55/349  | 0.6041 | H-1→L (15%)<br>H→L (12%)<br>H→L+1(48%)                 | PhenA/a-PhN(CH <sub>3</sub> ) <sub>2</sub> → PhenA (ILCT/LLCT)<br>PhenB/b-PhN(CH <sub>3</sub> ) <sub>2</sub> → PhenA (LLCT)<br>PhenB/b-PhN(CH <sub>3</sub> ) <sub>2</sub> → PhenA/PhenB<br>(LLCT/ILCT) |            |
| <b>(P2)<sub>2</sub>Zn-ATP</b> | S <sub>19</sub> | 5.35/232  | 0.4463 | H-2→L+7<br>(83%)                                       | Zn/ATP → PhenA/a-PhCl (LLCT)                                                                                                                                                                           |            |
|                               | S <sub>14</sub> | 5.08/244  | 0.1550 | H-4→L+2<br>(42%)<br>H-3→L+3<br>(18%)                   | ATP/Zn/PhenA → PhenA<br>(MCLT/LLCT/ILCT)<br>PhenA/a-PhCl→PhenA/a-PhCl/PhenB/b-<br>PhCl (LLCT/ILCT)                                                                                                     |            |
|                               | S <sub>12</sub> | 5.05/246  | 0.6028 | H-4→L+2<br>(11%)<br>H-3→ L+3<br>(32%)                  | ATP/Zn/PhenA → PhenA<br>(MLCT/LLCT/ILCT)<br>PhenA/a-PhCl→PhenA/a-PhCl/PhenB/b-<br>PhCl (LLCT/ILCT)                                                                                                     |            |
|                               | S <sub>8</sub>  | 4.85/255  | 0.7002 | H-4→L (37%)                                            | ATP/Zn/PhenA → PhenA<br>(MLCT/ILCT/LLCT)                                                                                                                                                               | 250        |
|                               | S <sub>7</sub>  | 4.78/ 259 | 0.3707 | H-4→L (14%)<br><br>H-1→L+1<br>(37%)                    | ATP/Zn/PhenA → PhenA<br>(MLCT/ILCT/LLCT)<br>PhenA/a-PhCl → PhenA/a-PhCl (ILCT)                                                                                                                         | 279<br>295 |
|                               | S <sub>6</sub>  | 4.58/ 271 | 0.4270 | H-3→ L+1<br>(13%)<br>H-1→ L+5<br>(25%)<br>H→ L+5 (45%) | PhenA/a-PhCl→ PhenA/a-PhCl (ILCT)<br>PhenA/a-PhCl → PhenB/b-PhCl (LLCT)<br>PhenB/b-PhCl → PhenB/b-PhCl (ILCT)                                                                                          |            |
|                               | S <sub>5</sub>  | 4.53/274  | 0.8605 | H-8→L+4                                                | Zn/ATP→PhenA/PhenB/a-PhCl/b-PhCl                                                                                                                                                                       |            |

|                               |                 |           |        |                                                                |                                                                                                                                                               |            |
|-------------------------------|-----------------|-----------|--------|----------------------------------------------------------------|---------------------------------------------------------------------------------------------------------------------------------------------------------------|------------|
|                               |                 |           |        | (48%)<br>H→L+4 (28%)                                           | (MLCT/LLCT)<br>PhenB/b-PhCl → PhenA/PhenB/a-PhCl/b-PhCl (ILCT/LLCT)                                                                                           |            |
|                               | S <sub>3</sub>  | 4.21/ 295 | 0.5845 | H-1→L+2 (50%)<br>H→L+2 (26%)                                   | PhenA/a-PhCl → PhenA (ILCT/LLCT)<br>PhenB/b-PhCl → PhenA (LLCT)                                                                                               |            |
|                               | S <sub>1</sub>  | 3.88/319  | 0.4633 | H-1→L (40%)<br>H→L+1 (45%)                                     | PhenA/a-PhCl → PhenA (LLCT/ILCT)<br>PhenB/b-PhCl → PhenA/a-PhCl (LLCT)                                                                                        | 340        |
| <b>(P3)<sub>2</sub>Zn-ATP</b> | S <sub>16</sub> | 4.87/ 255 | 0.6515 | H-4→L+2 (28%)<br>H-4→L+3 (15%)<br>H-1→L+4 (12%)<br>H→L (11%)   | ATP →PhenA (LLCT)<br>ATP →PhenA/a-PhNO <sub>2</sub> /PhenB (LLCT)<br>b-PhNO <sub>2</sub> /PhenB → PhenB (LLCT/ILCT)<br>ATP→ a-PhNO <sub>2</sub> /PhenA (LLCT) | 260<br>312 |
|                               | S <sub>15</sub> | 4.86/ 255 | 0.1102 | H → L (63%)                                                    | ATP→ a-PhNO <sub>2</sub> /PhenA (LLCT)                                                                                                                        |            |
|                               | S <sub>14</sub> | 4.79/ 259 | 0.3529 | H-4→L+2 (12%)<br>H-3→L+2 (15%)<br>H-3→L+3 (37%)<br>H→L+5 (11%) | ATP →PhenA (LLCT)<br>Zn/ATP → PhenA (MLCT/LLCT)<br>Zn/ATP → PhenA/a-PhNO <sub>2</sub> /PhenB (MLCT/LLCT)<br>ATP→ PhenA/a-PhNO <sub>2</sub> /PhenB (LLCT)      |            |
|                               | S <sub>5</sub>  | 4.05/ 306 | 0.1039 | H→L+2 (23%)<br>H→L+3 (47%)                                     | ATP→ PhenA (LLCT)<br>ATP→ PhenA/a-PhNO <sub>2</sub> /PhenB (LLCT)                                                                                             |            |
|                               | S <sub>2</sub>  | 3.81/ 325 | 0.1575 | H-1→L (22%)                                                    | b-PhNO <sub>2</sub> /PhenB → a-PhNO <sub>2</sub> /PhenA (LLCT)                                                                                                |            |

|  |                |           |        |             |                                                                |     |
|--|----------------|-----------|--------|-------------|----------------------------------------------------------------|-----|
|  |                |           |        | H→L+1 (52%) | ATP→ b-PhNO <sub>2</sub> /PhenB (LLCT)                         | 330 |
|  | S <sub>1</sub> | 3.76/ 330 | 1.9722 | H-1→L (55%) | b-PhNO <sub>2</sub> /PhenB → a-PhNO <sub>2</sub> /PhenA (LLCT) | 440 |
|  |                |           |        | H→L+1 (18%) | ATP→ b-PhNO <sub>2</sub> /PhenB (LLCT)                         |     |

\* PhenA(B), a(b)-PhPn represent the imidazoline fused phenanthroline and substituted phenyl units, respectively of ligand A(B).

**Table S7.** Calculated HOMO-LUMO contours with energy levels (in eV) computed for the optimized geometries of ((Pn)<sub>2</sub>Zn and (Pn)<sub>2</sub>Zn -ATP) molecules (n=1,2,3) with isosurface=0.025

|                                | LUMO   | GAP          | HOMO    |
|--------------------------------|--------|--------------|---------|
| <b>(P1)<sub>2</sub>Zn</b>      | -7.131 | <b>1.490</b> | -8.621  |
| <b>(P2)<sub>2</sub>Zn</b>      | -7.678 | <b>2.429</b> | -10.106 |
| <b>(P3)<sub>2</sub>Zn</b>      | -7.920 | <b>2.903</b> | -10.823 |
| <b>(P1)<sub>2</sub>Zn -ATP</b> | -2.069 | <b>3.064</b> | -5.133  |
| <b>(P2)<sub>2</sub>Zn -ATP</b> | -2.453 | <b>3.472</b> | -5.925  |
| <b>(P3)<sub>2</sub>Zn -ATP</b> | -3.180 | <b>2.868</b> | -6.048  |

at B3LYP/6-31g\* level of theory.
